# Supplementary material for: KRAS-mediated upregulation of CIP2A promotes suppression of PP2A-B56α to initiate pancreatic cancer development
Source: PubMed Central journal article supplement — bioRxiv. 2024 May 23:2023.07.01.547283. Preprint. [Version 2] doi: 10.1101/2023.07.01.547283 (PMC11142131; doi:10.1101/2023.07.01.547283), 2024-05-23

Supplemental 1

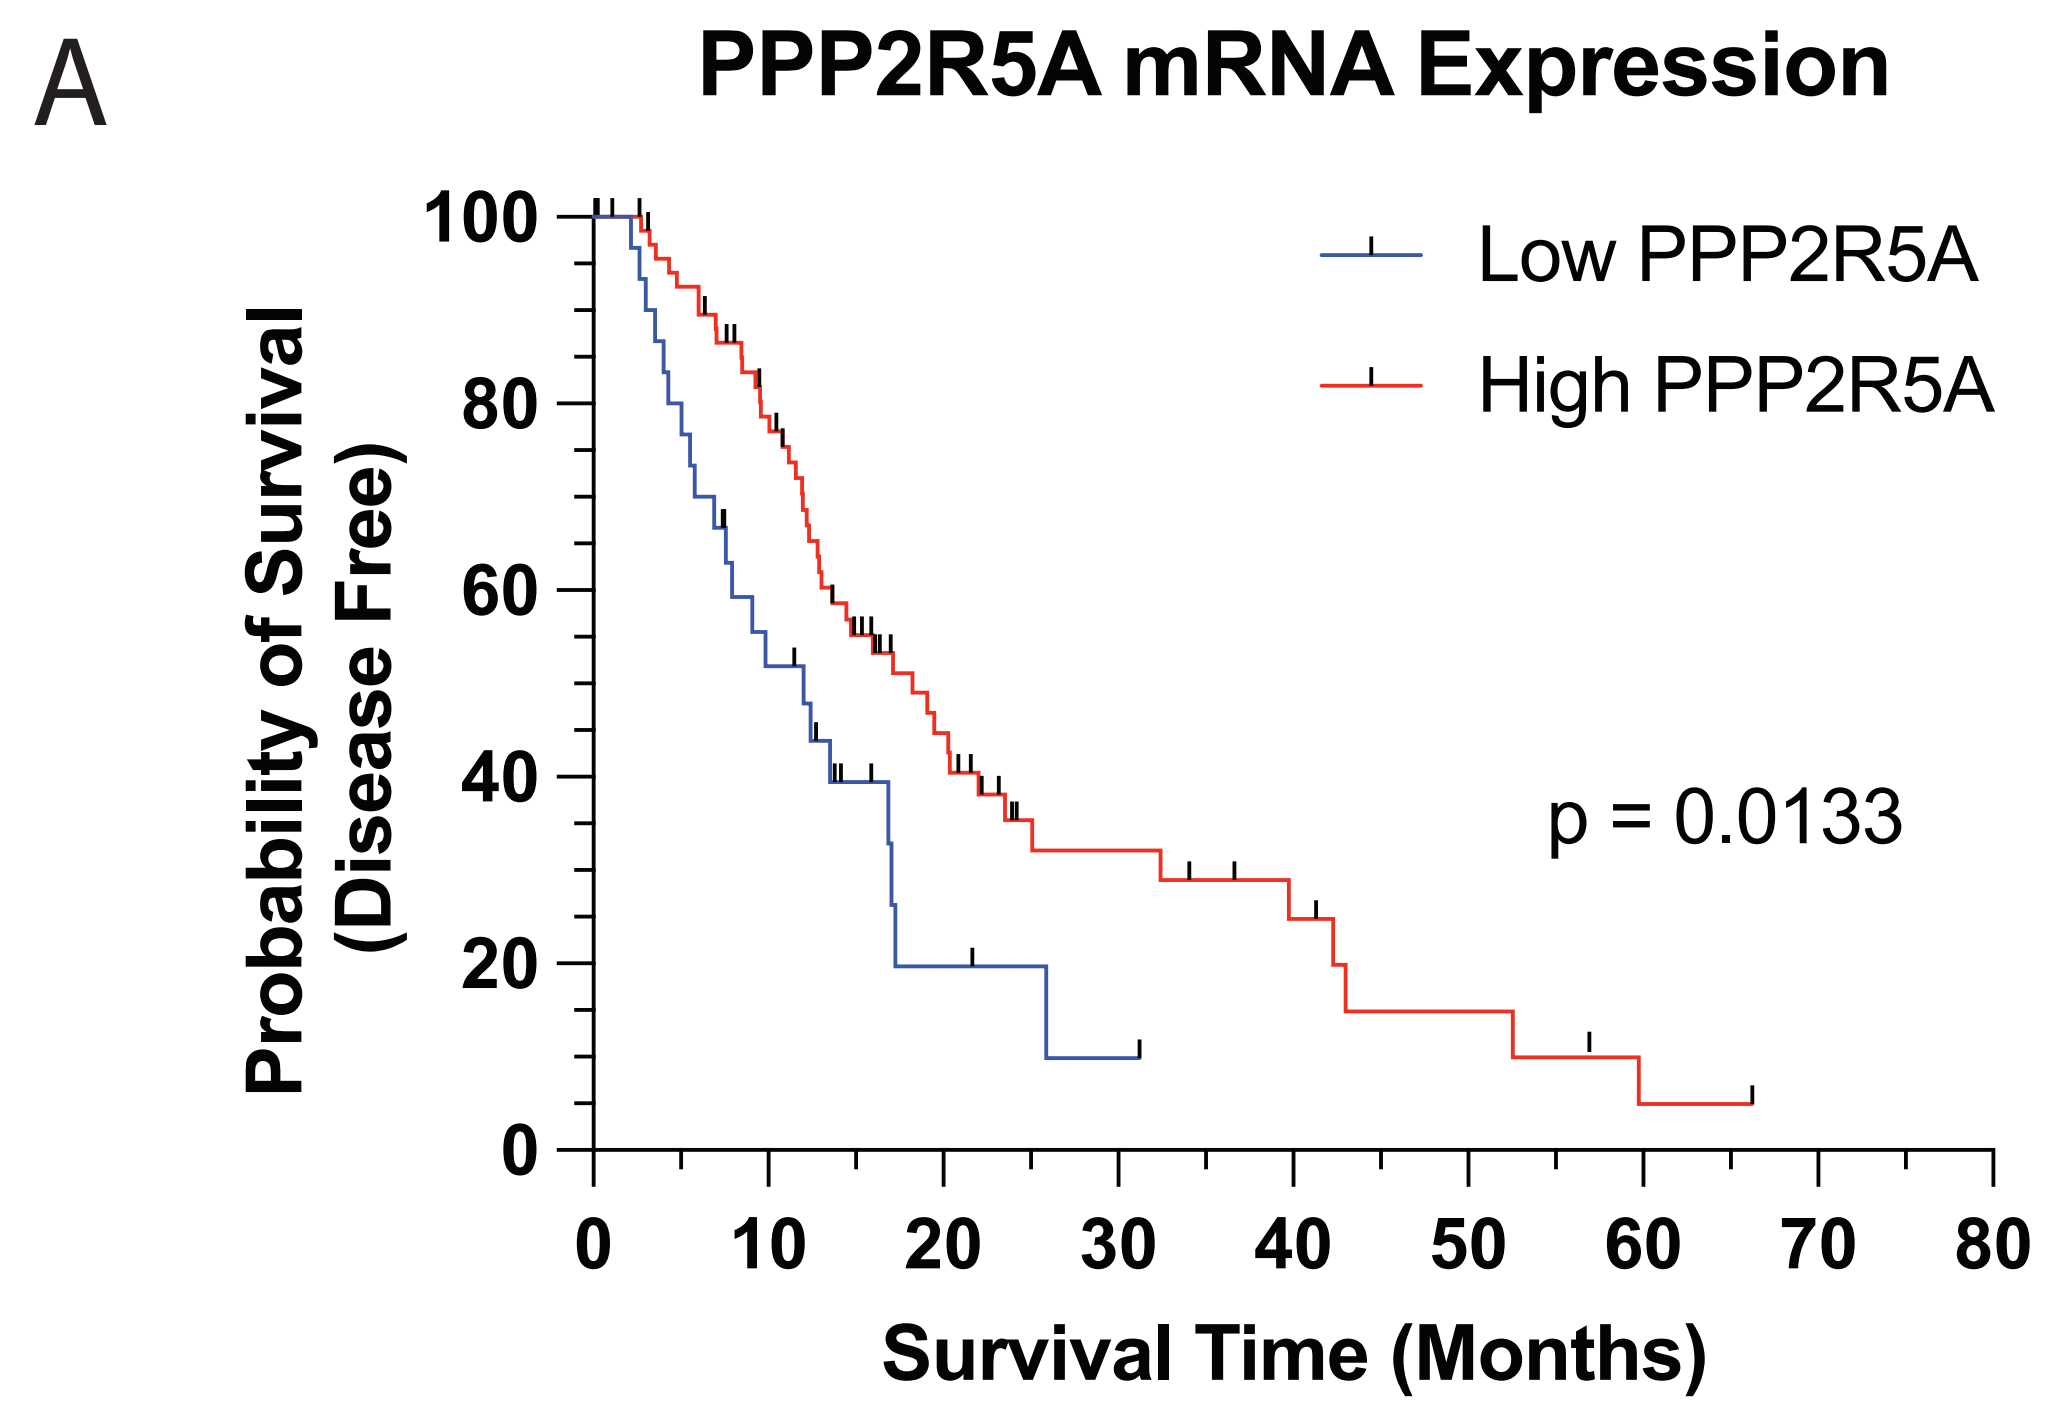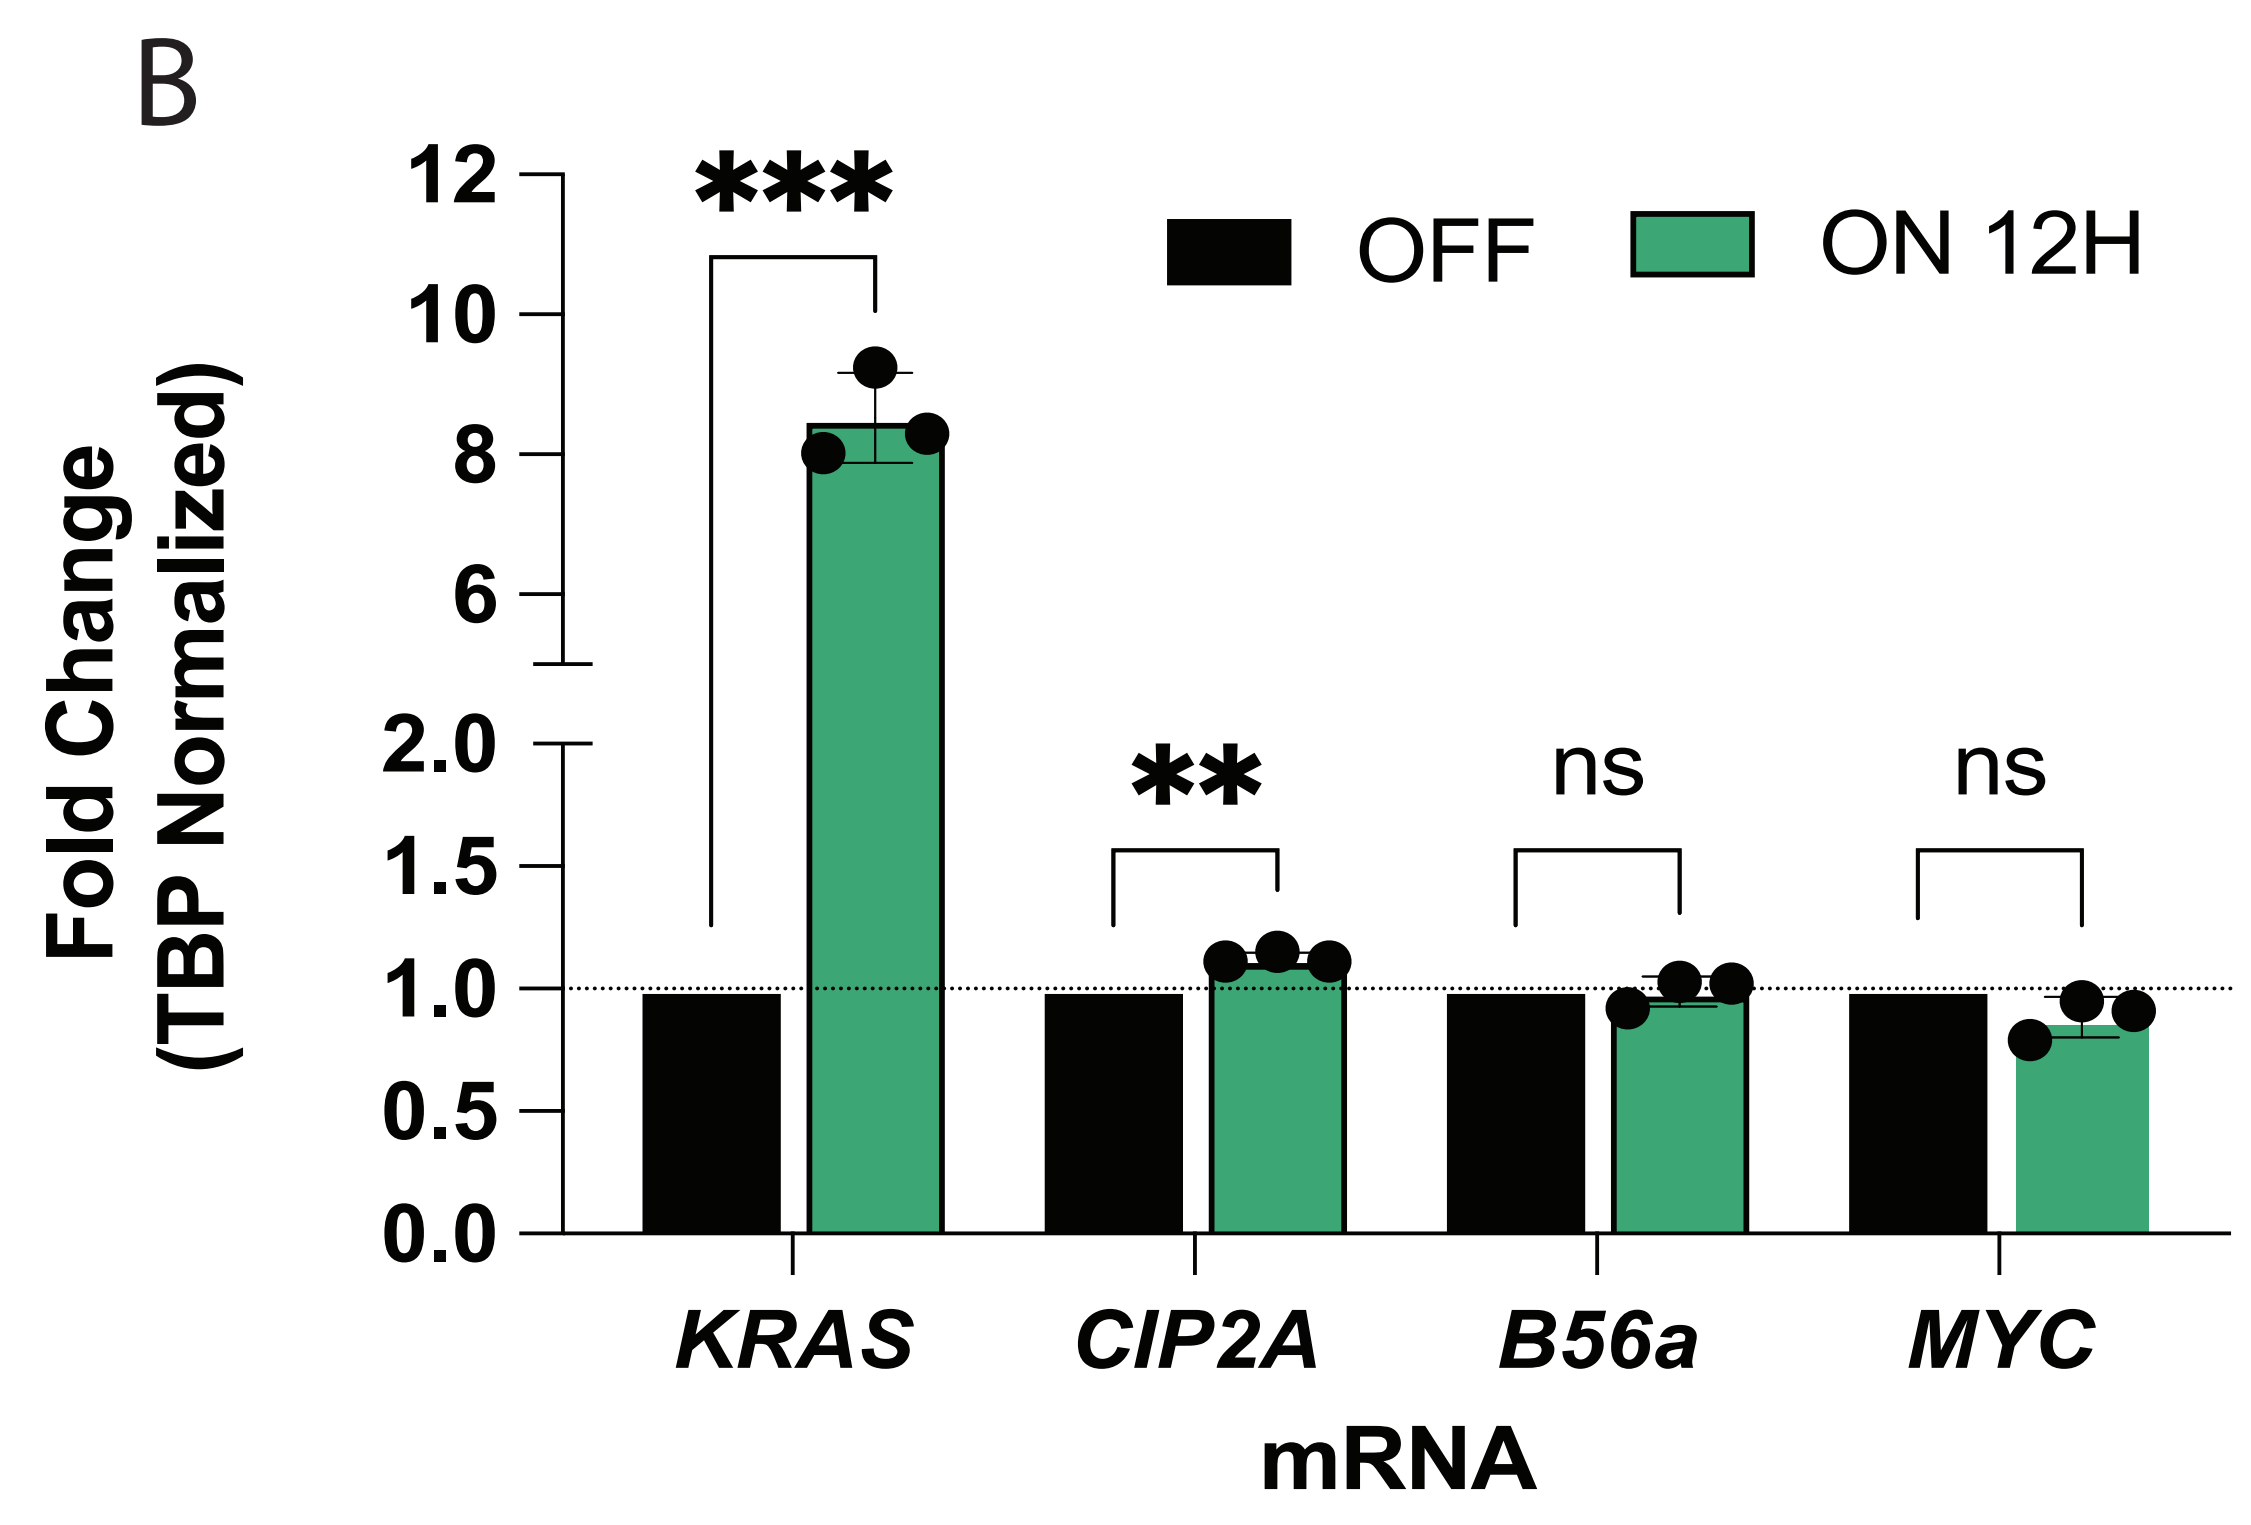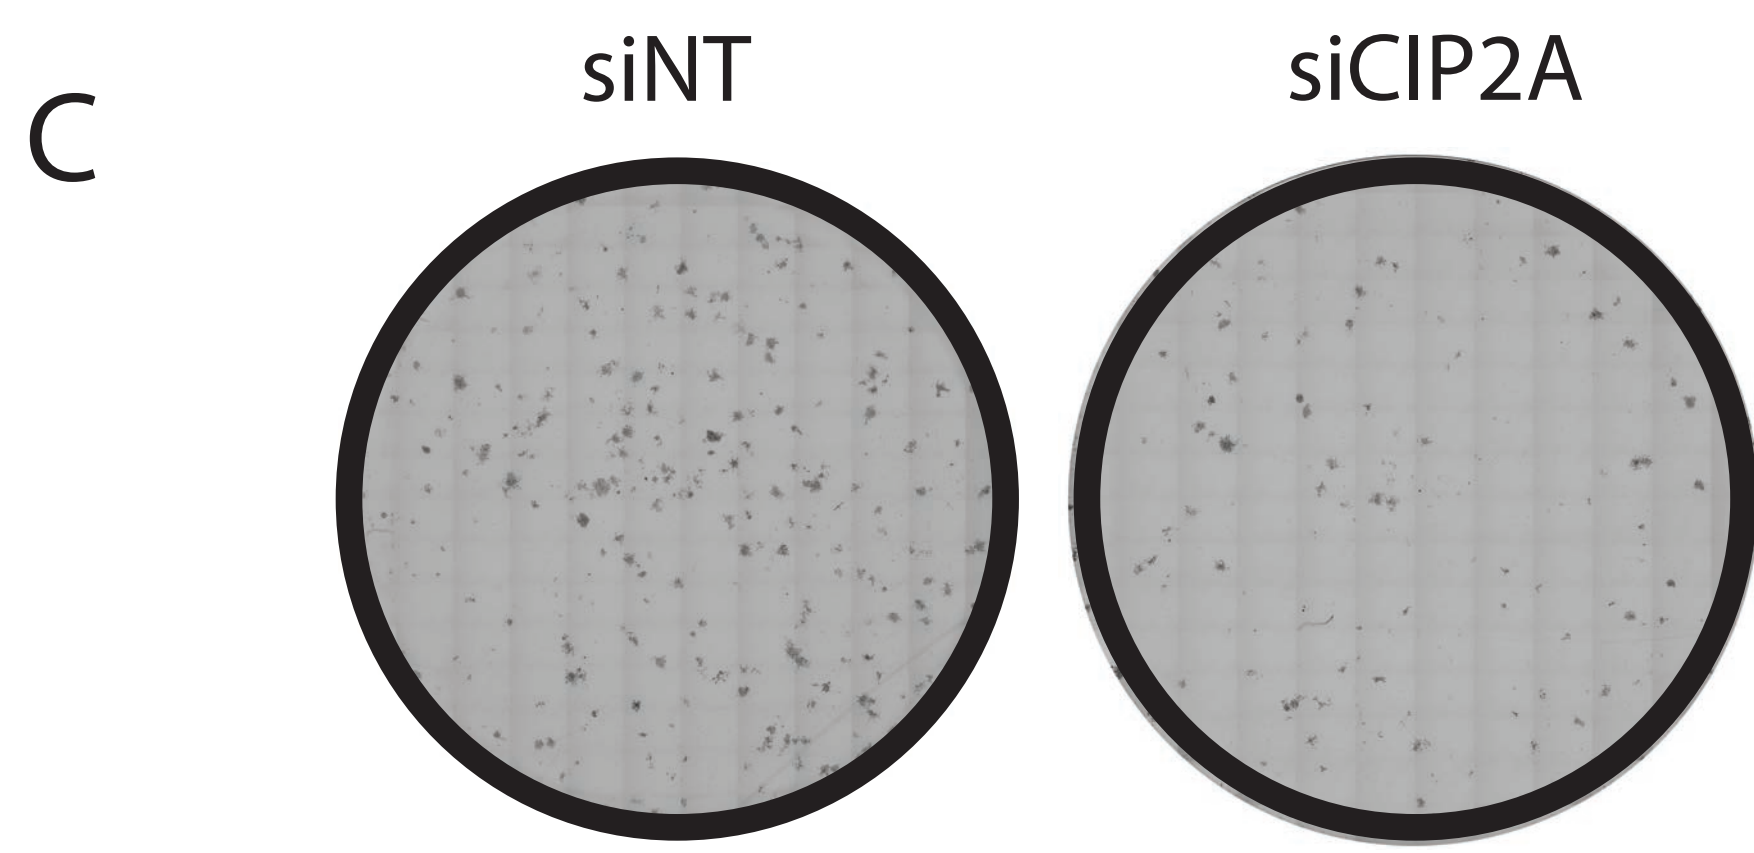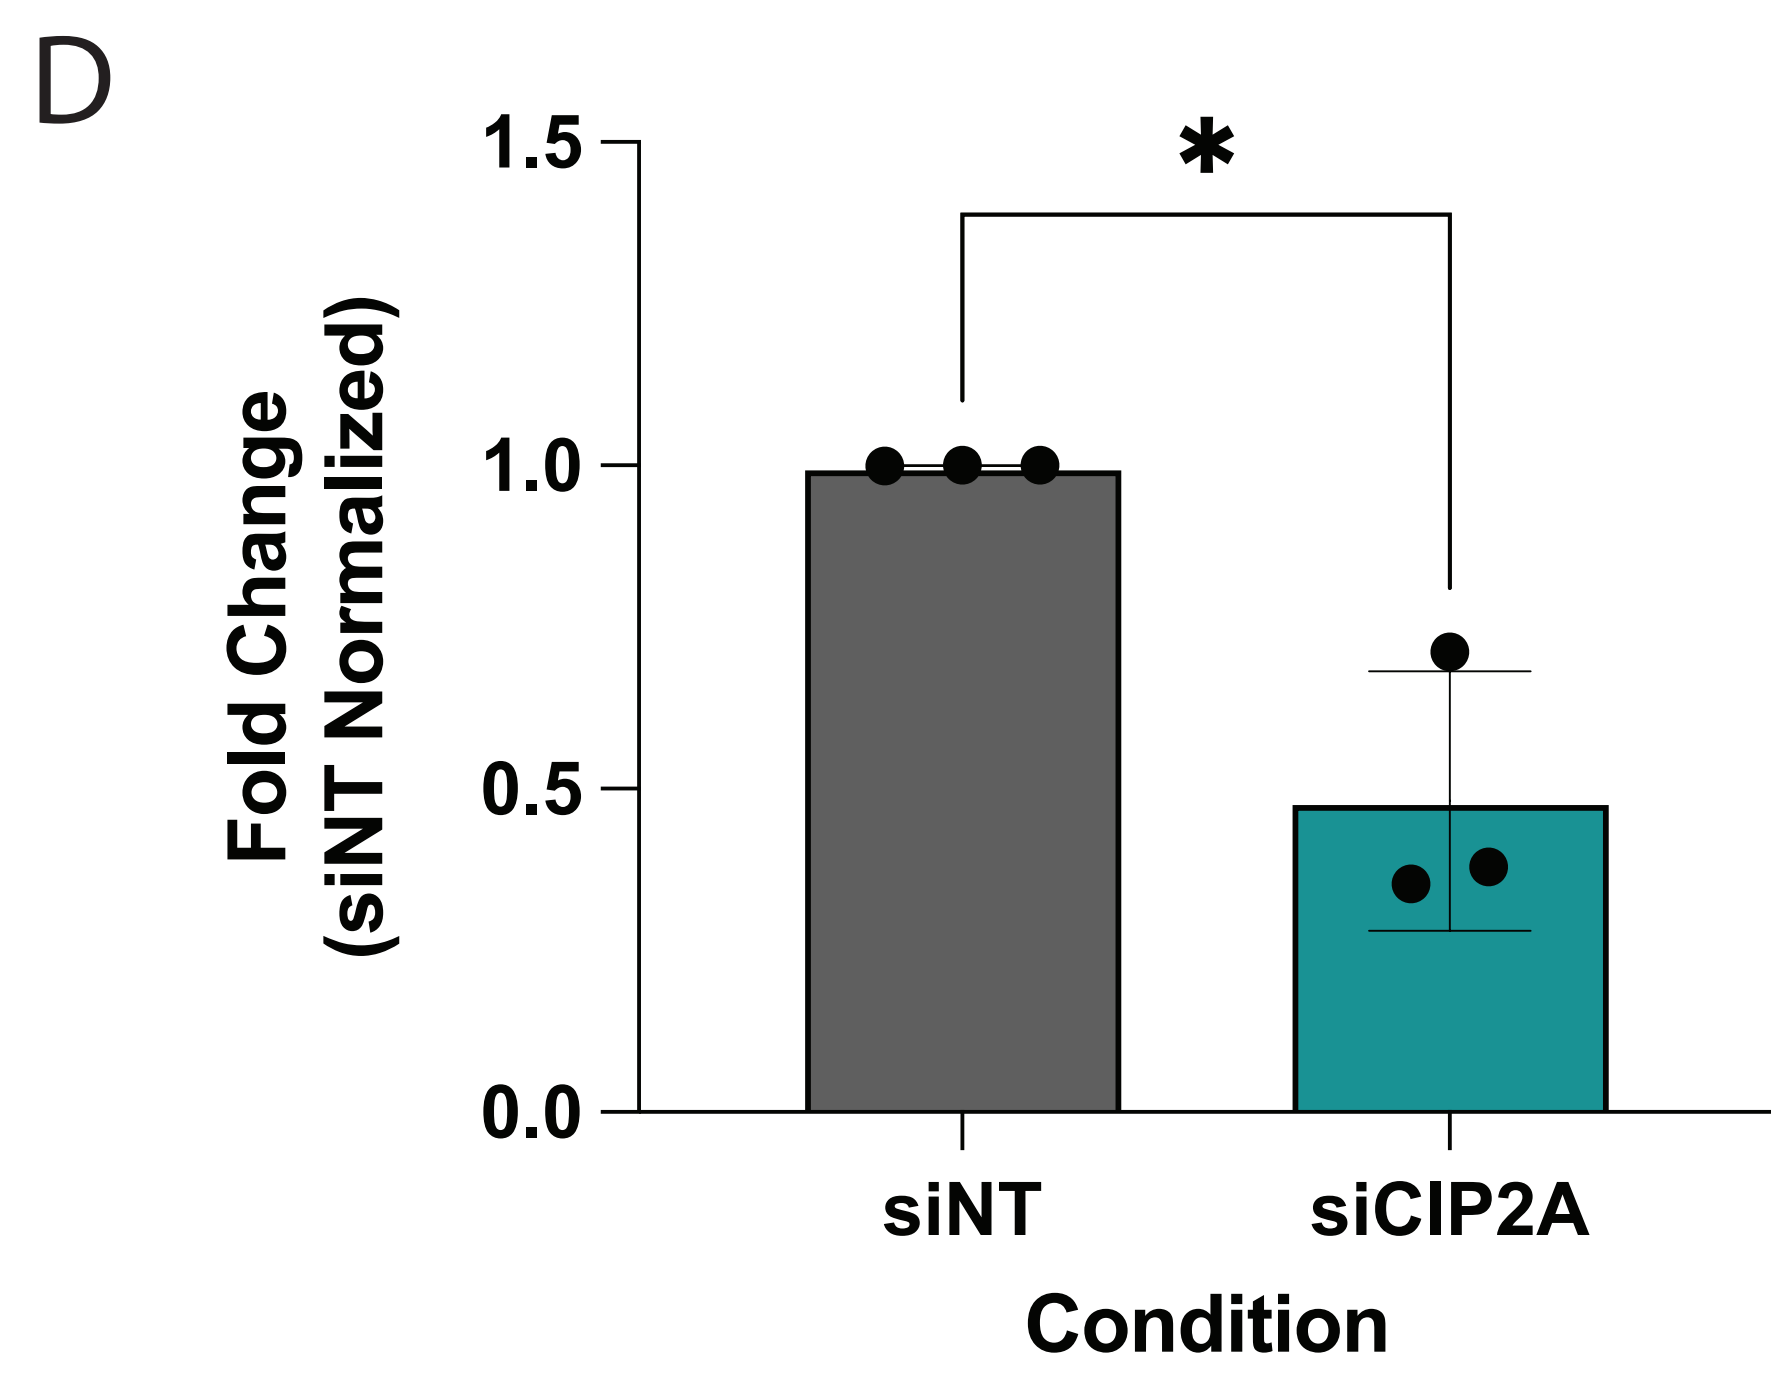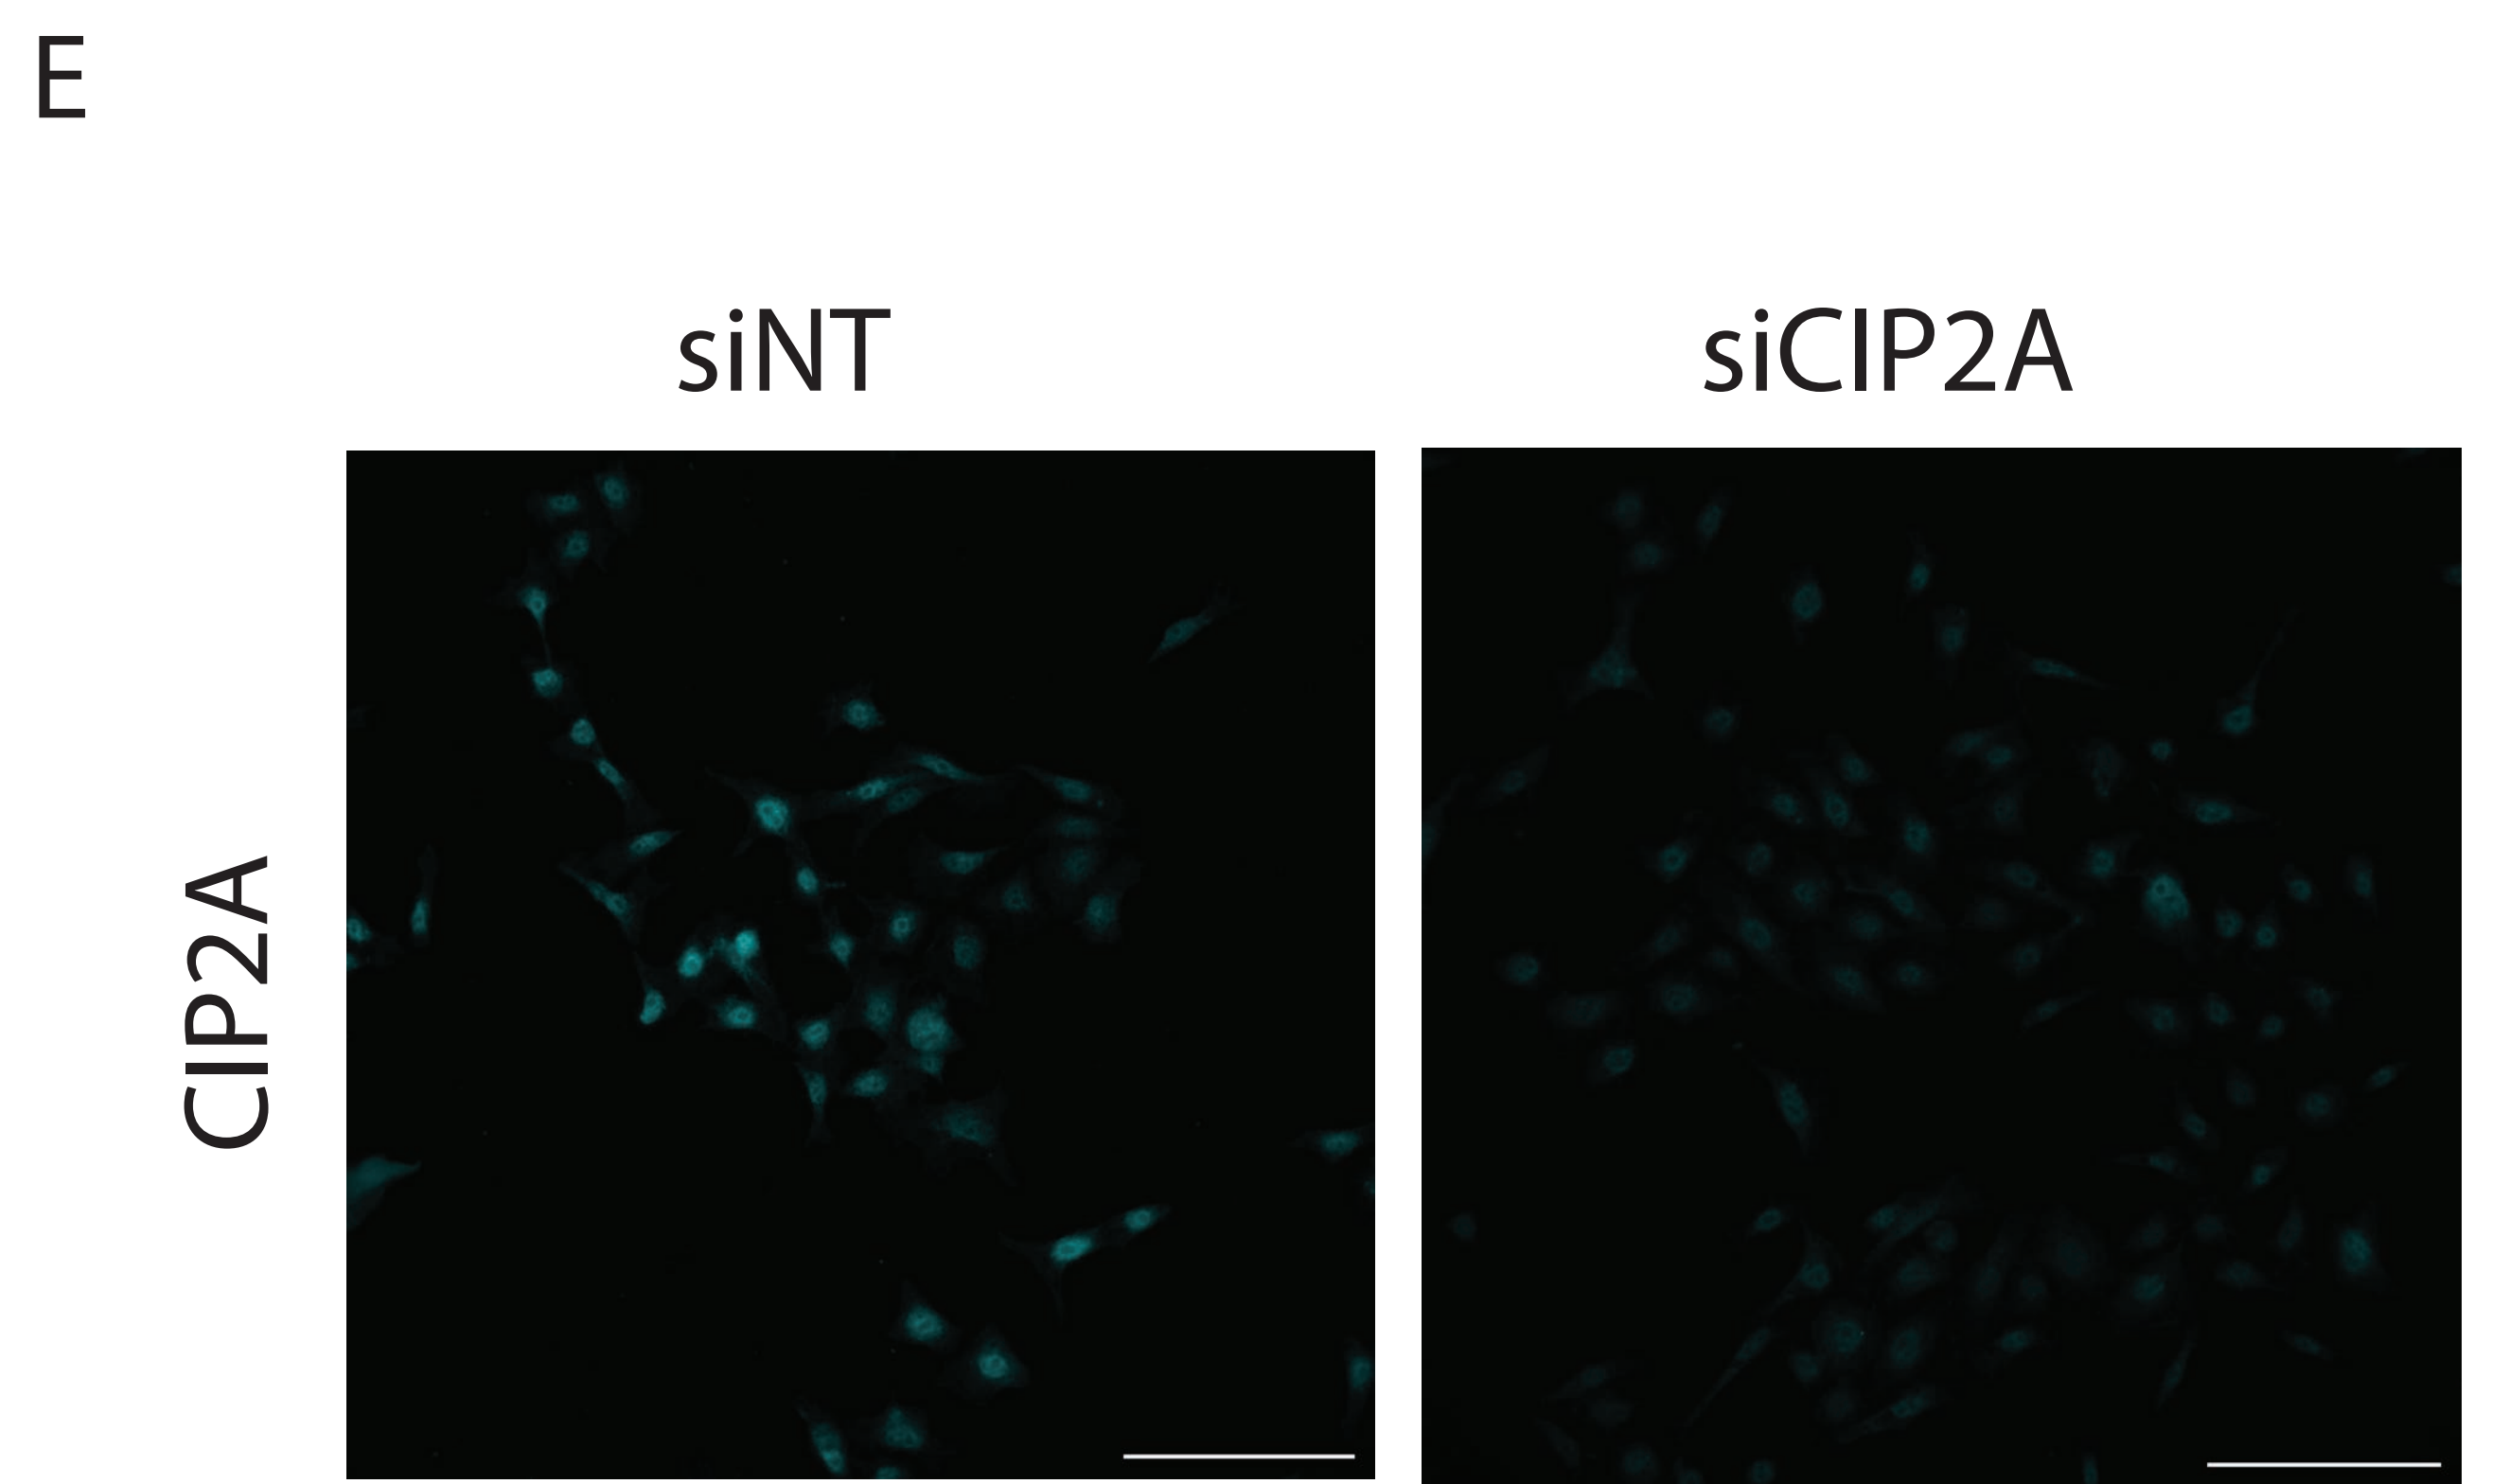

# Supplemental 2

**A**

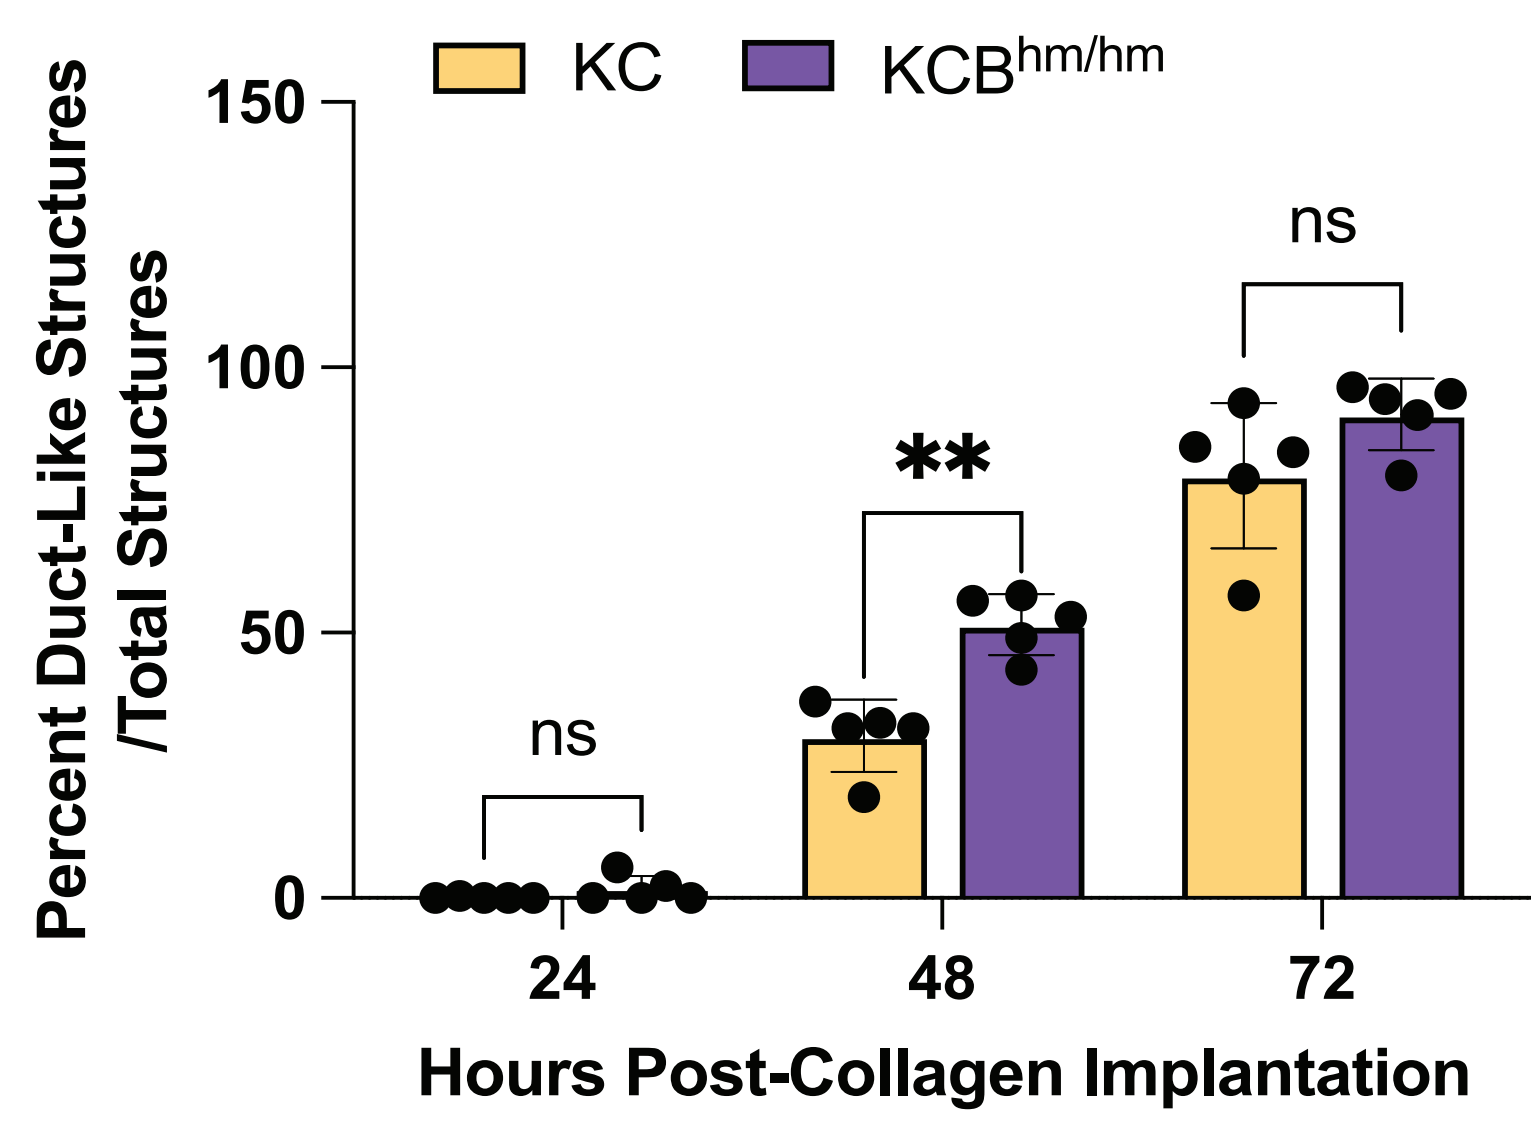

**B**

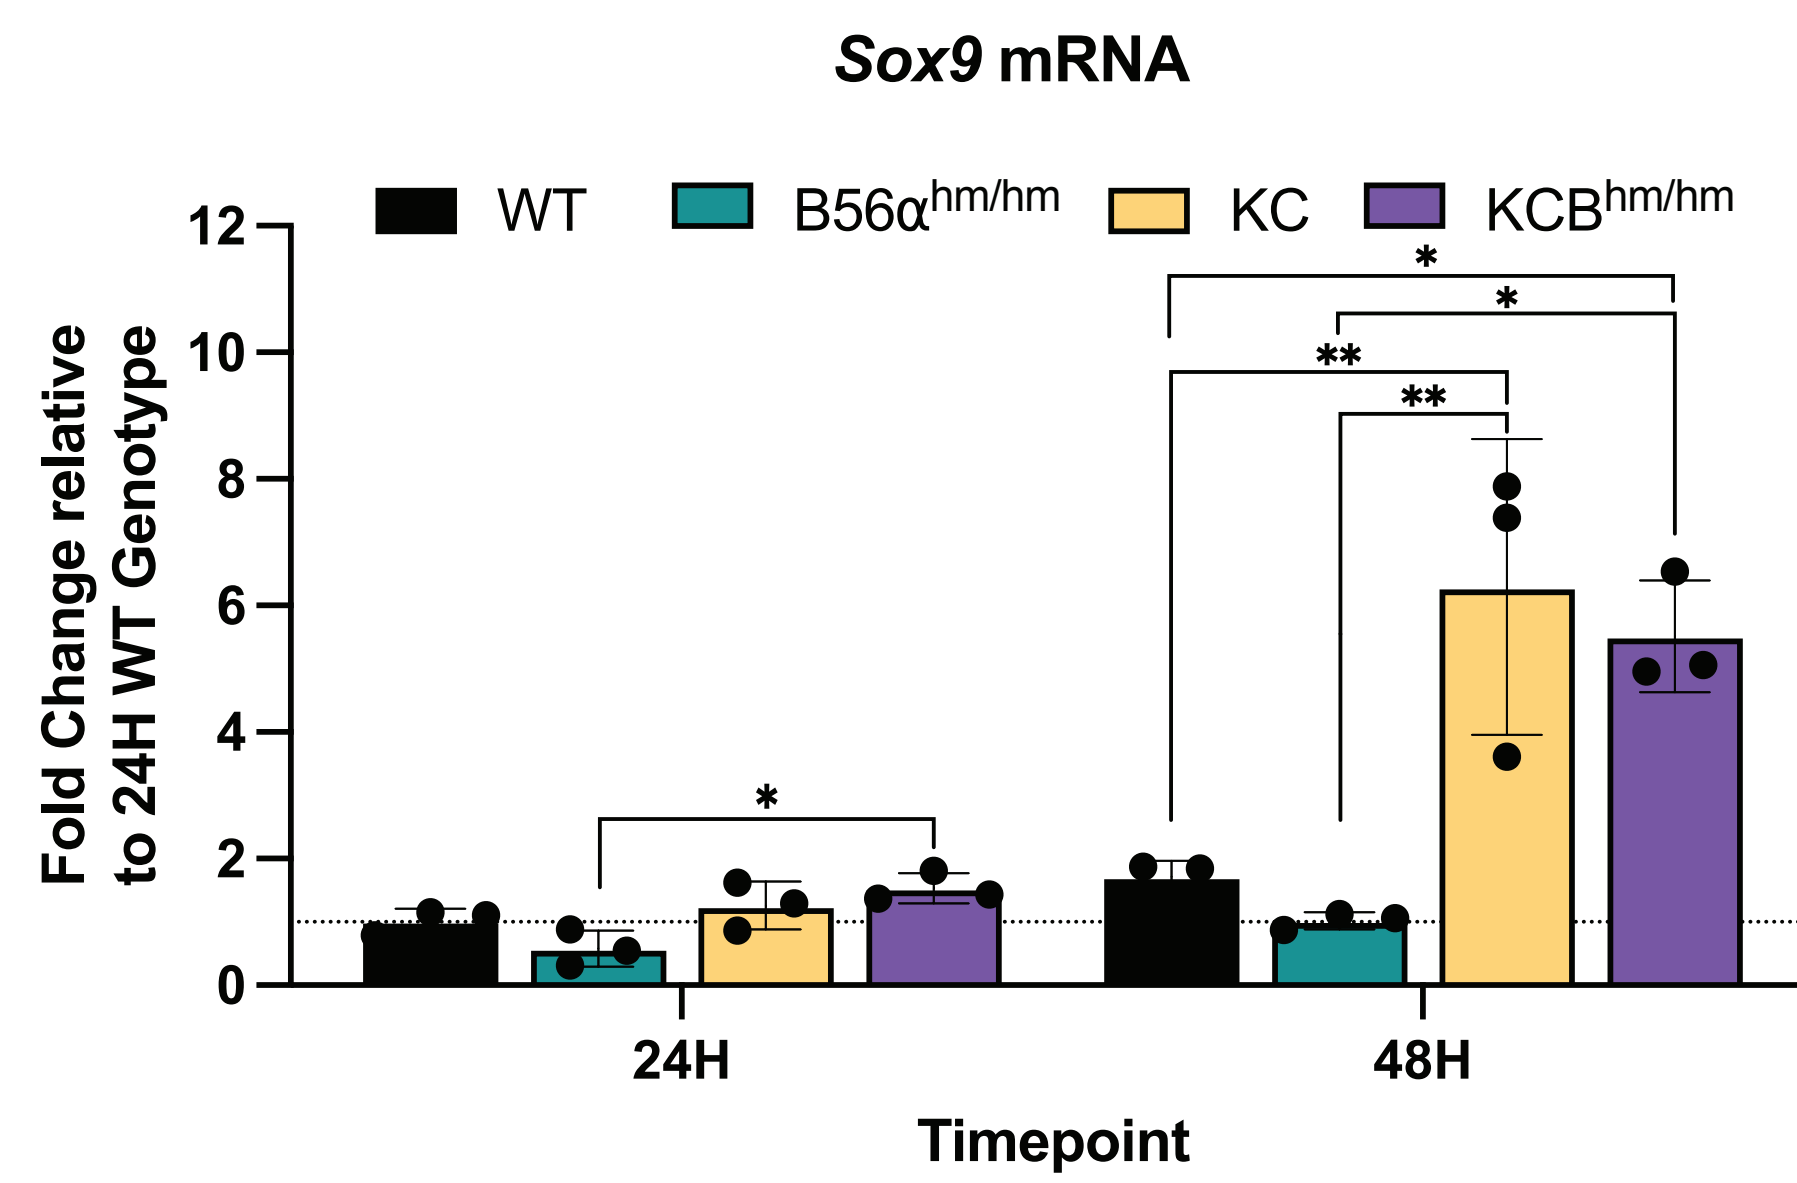

**C**

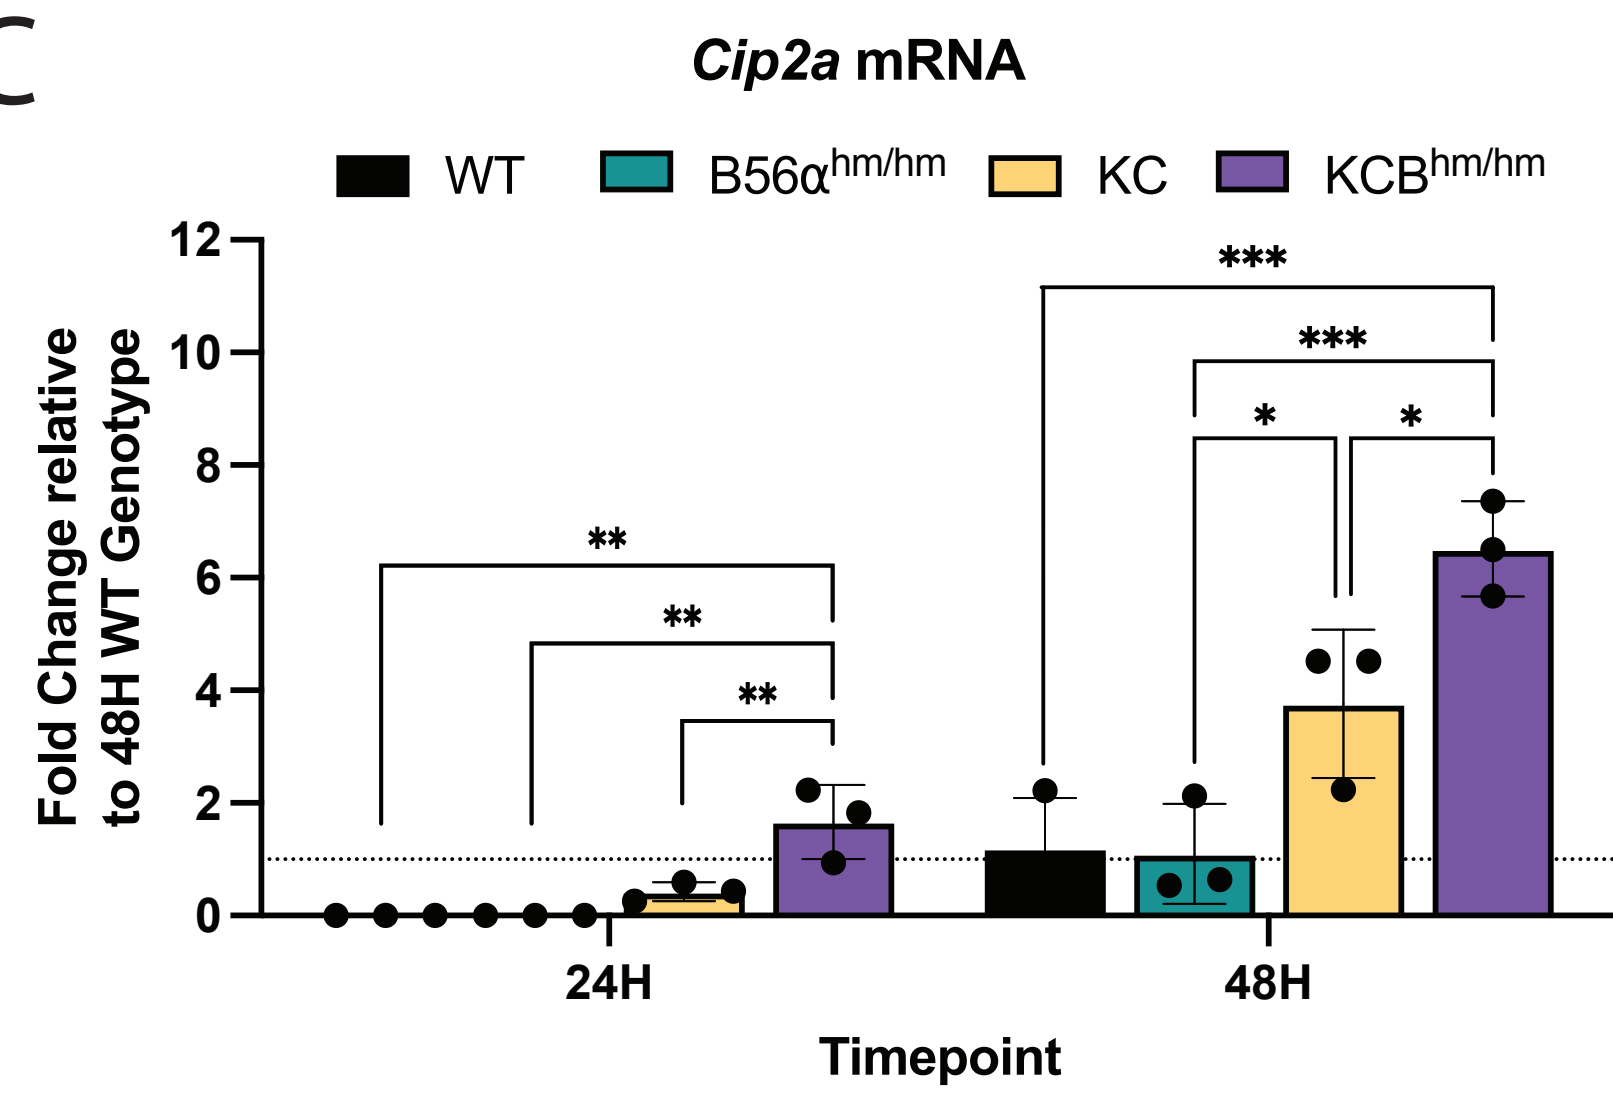

**D**

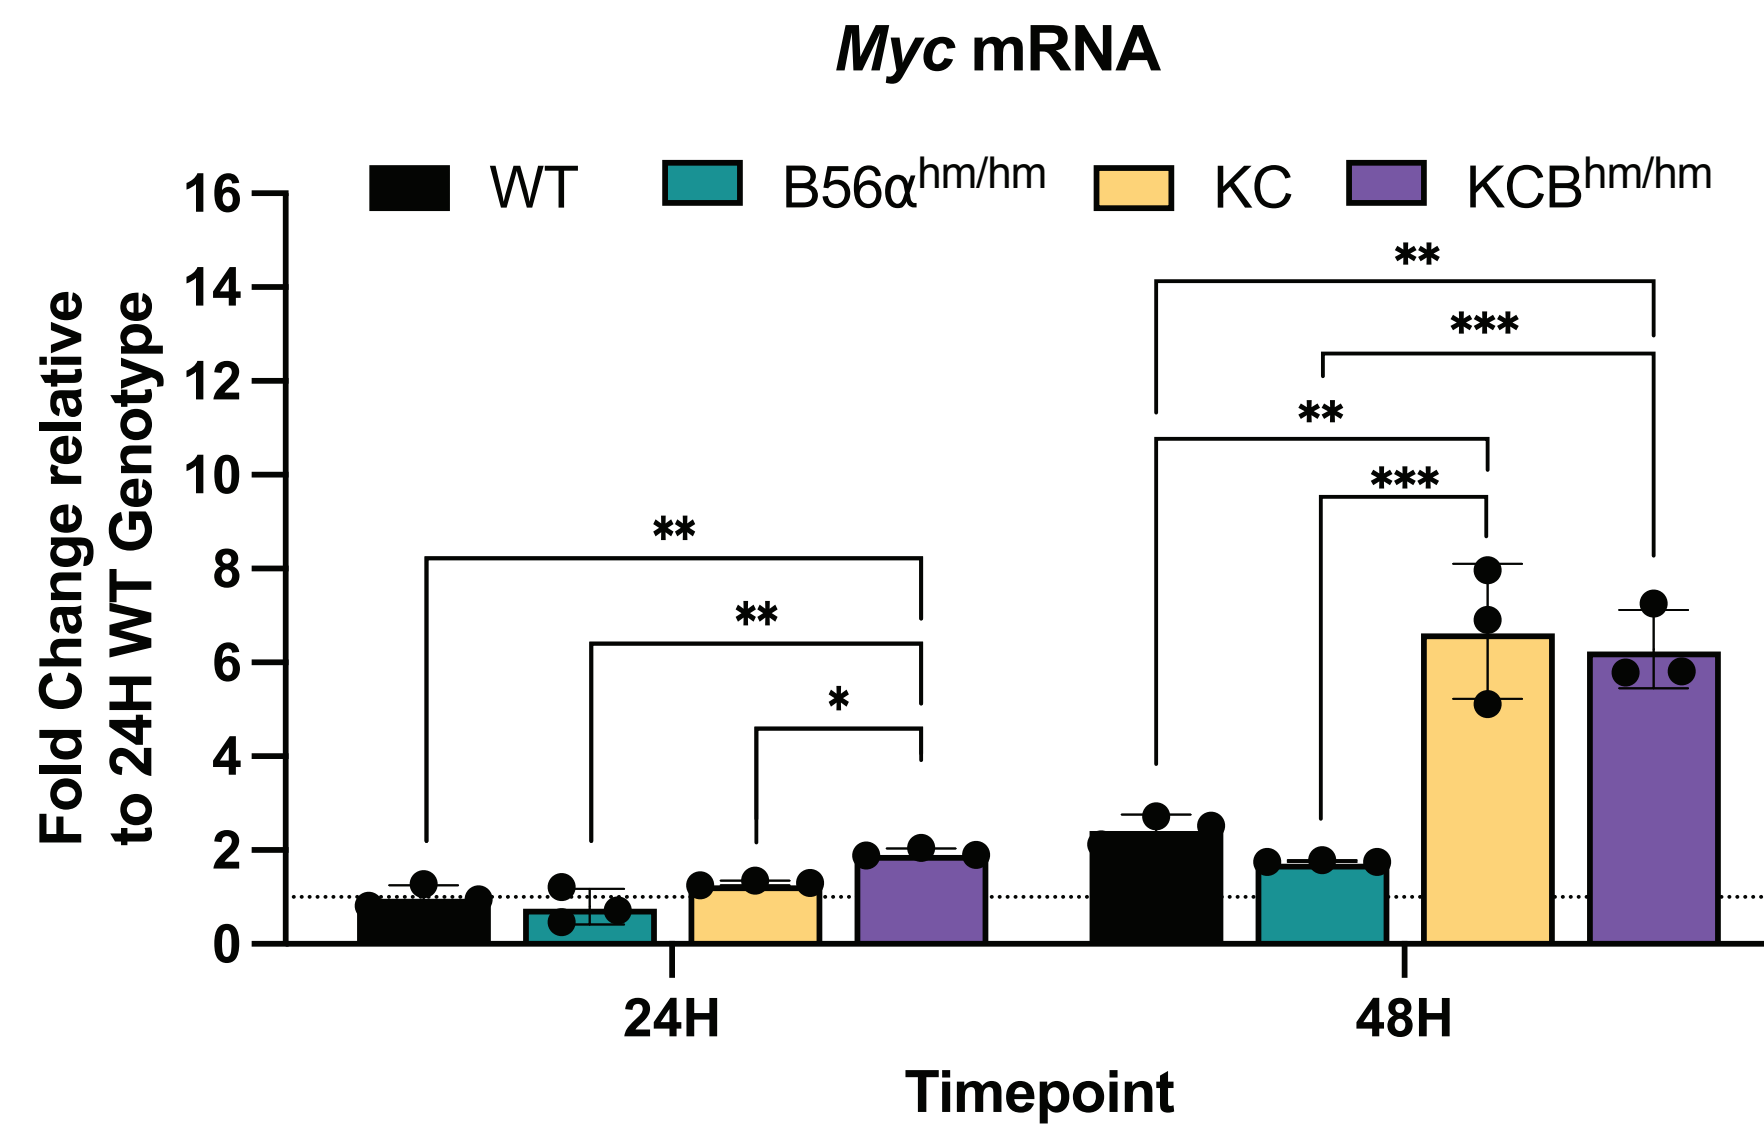

**E**

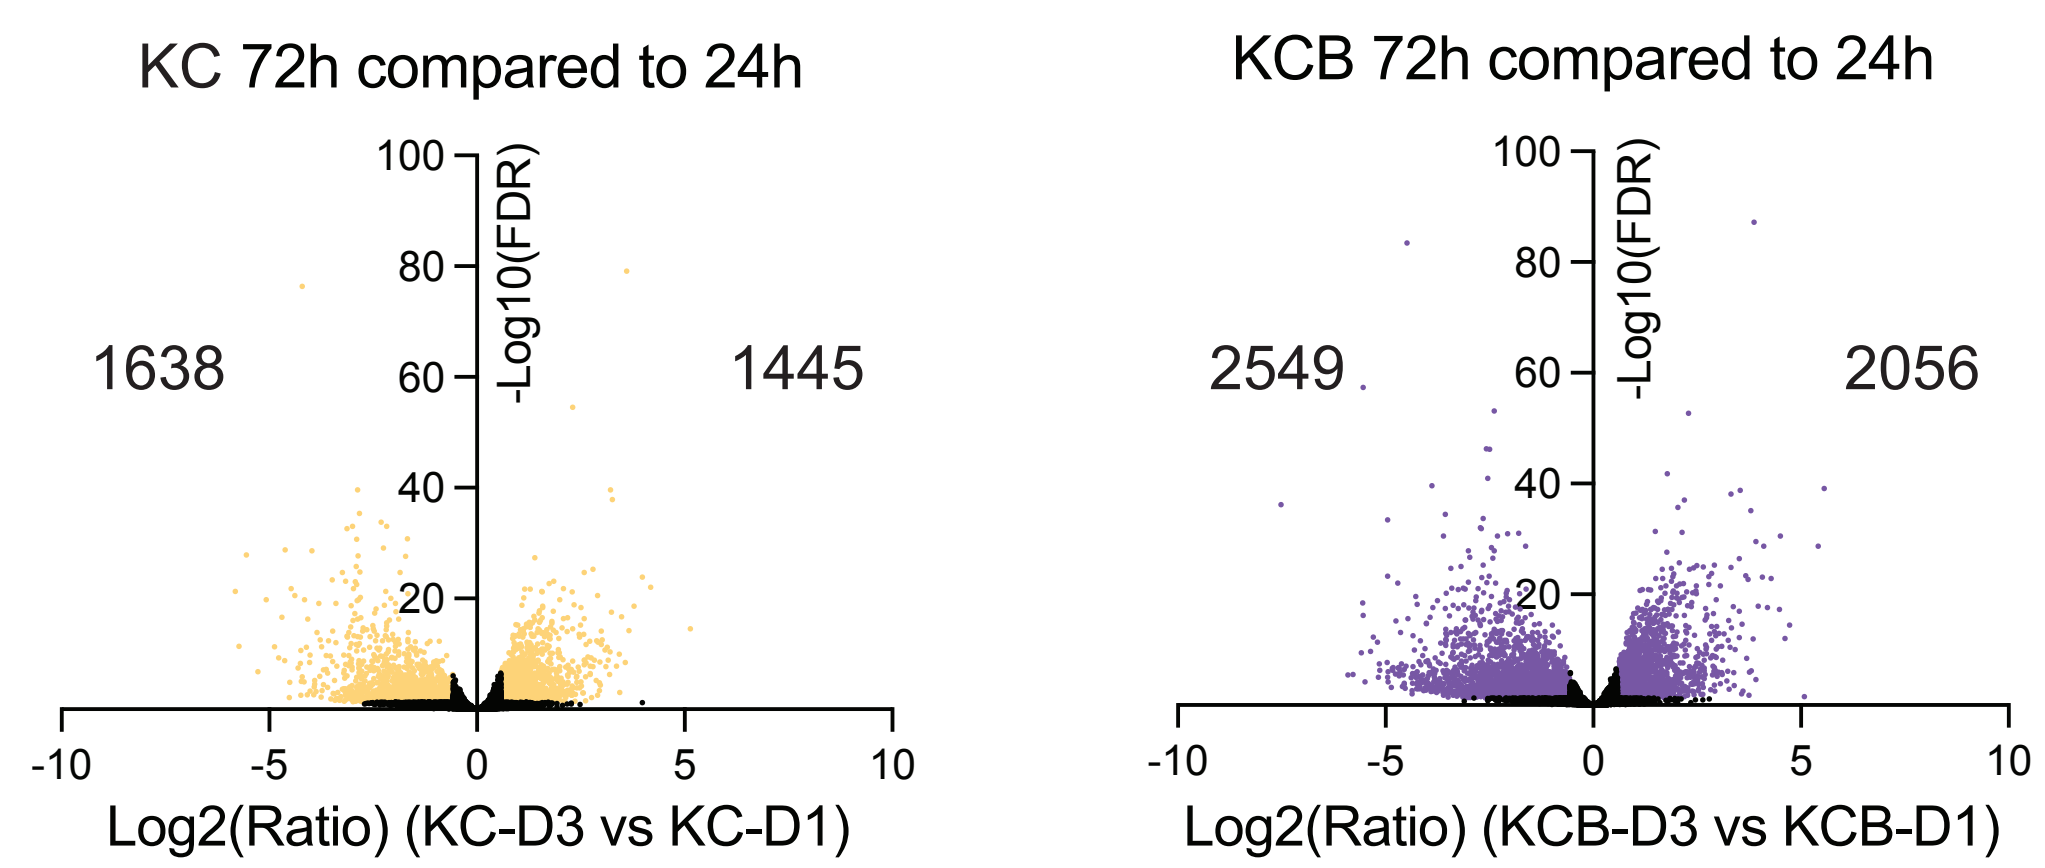

**F**

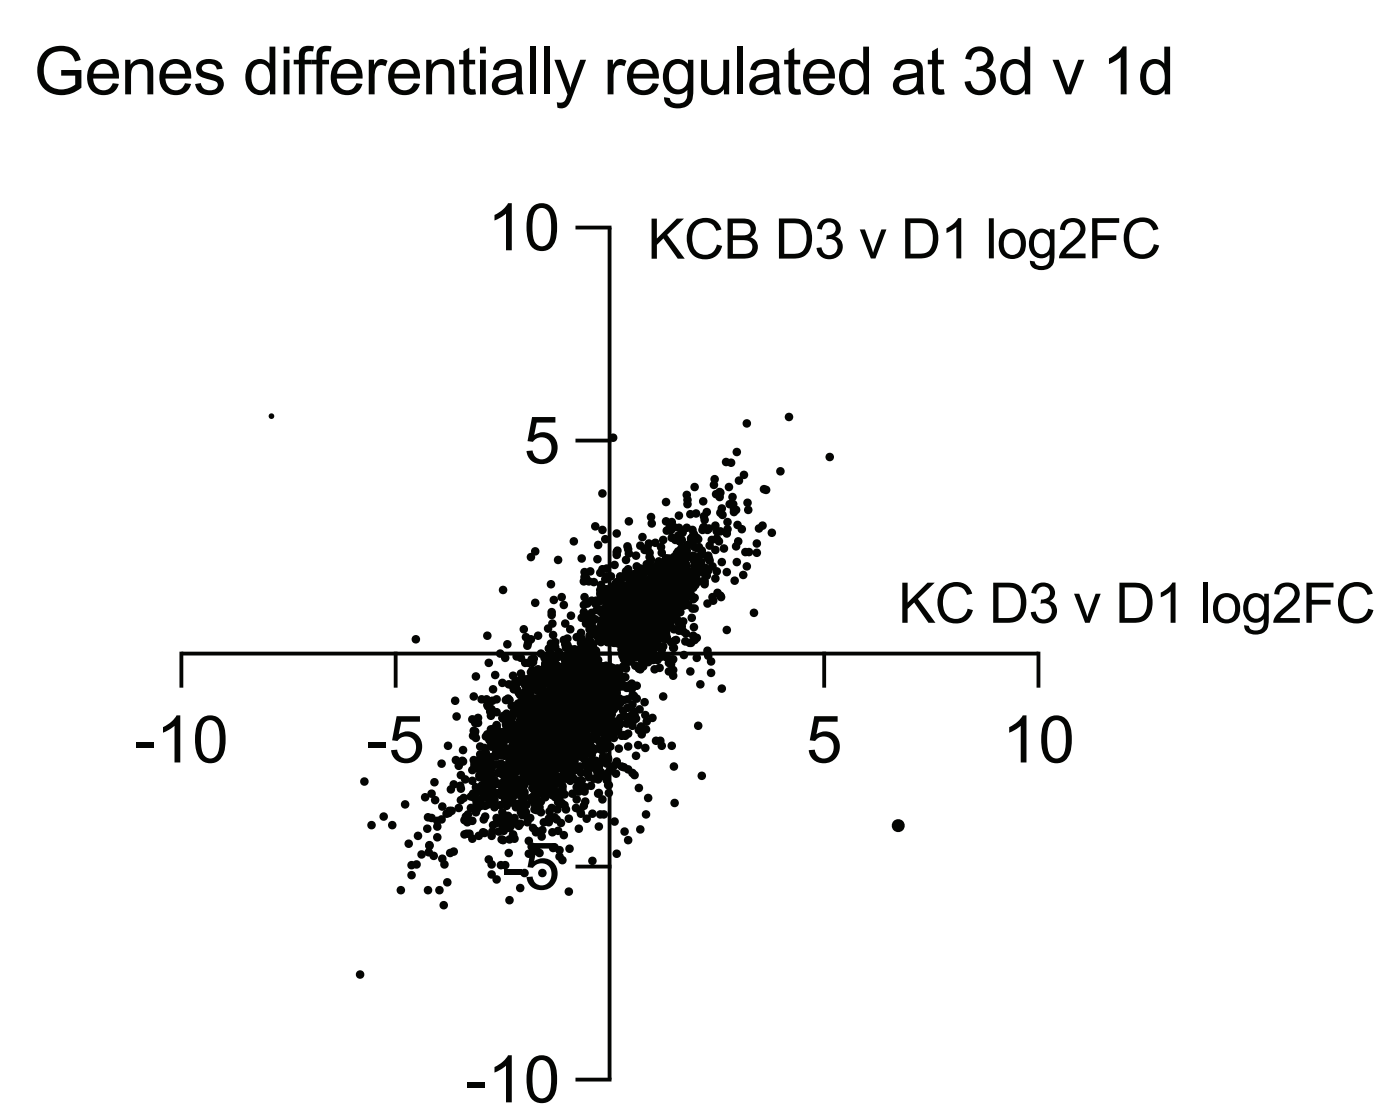

**G**

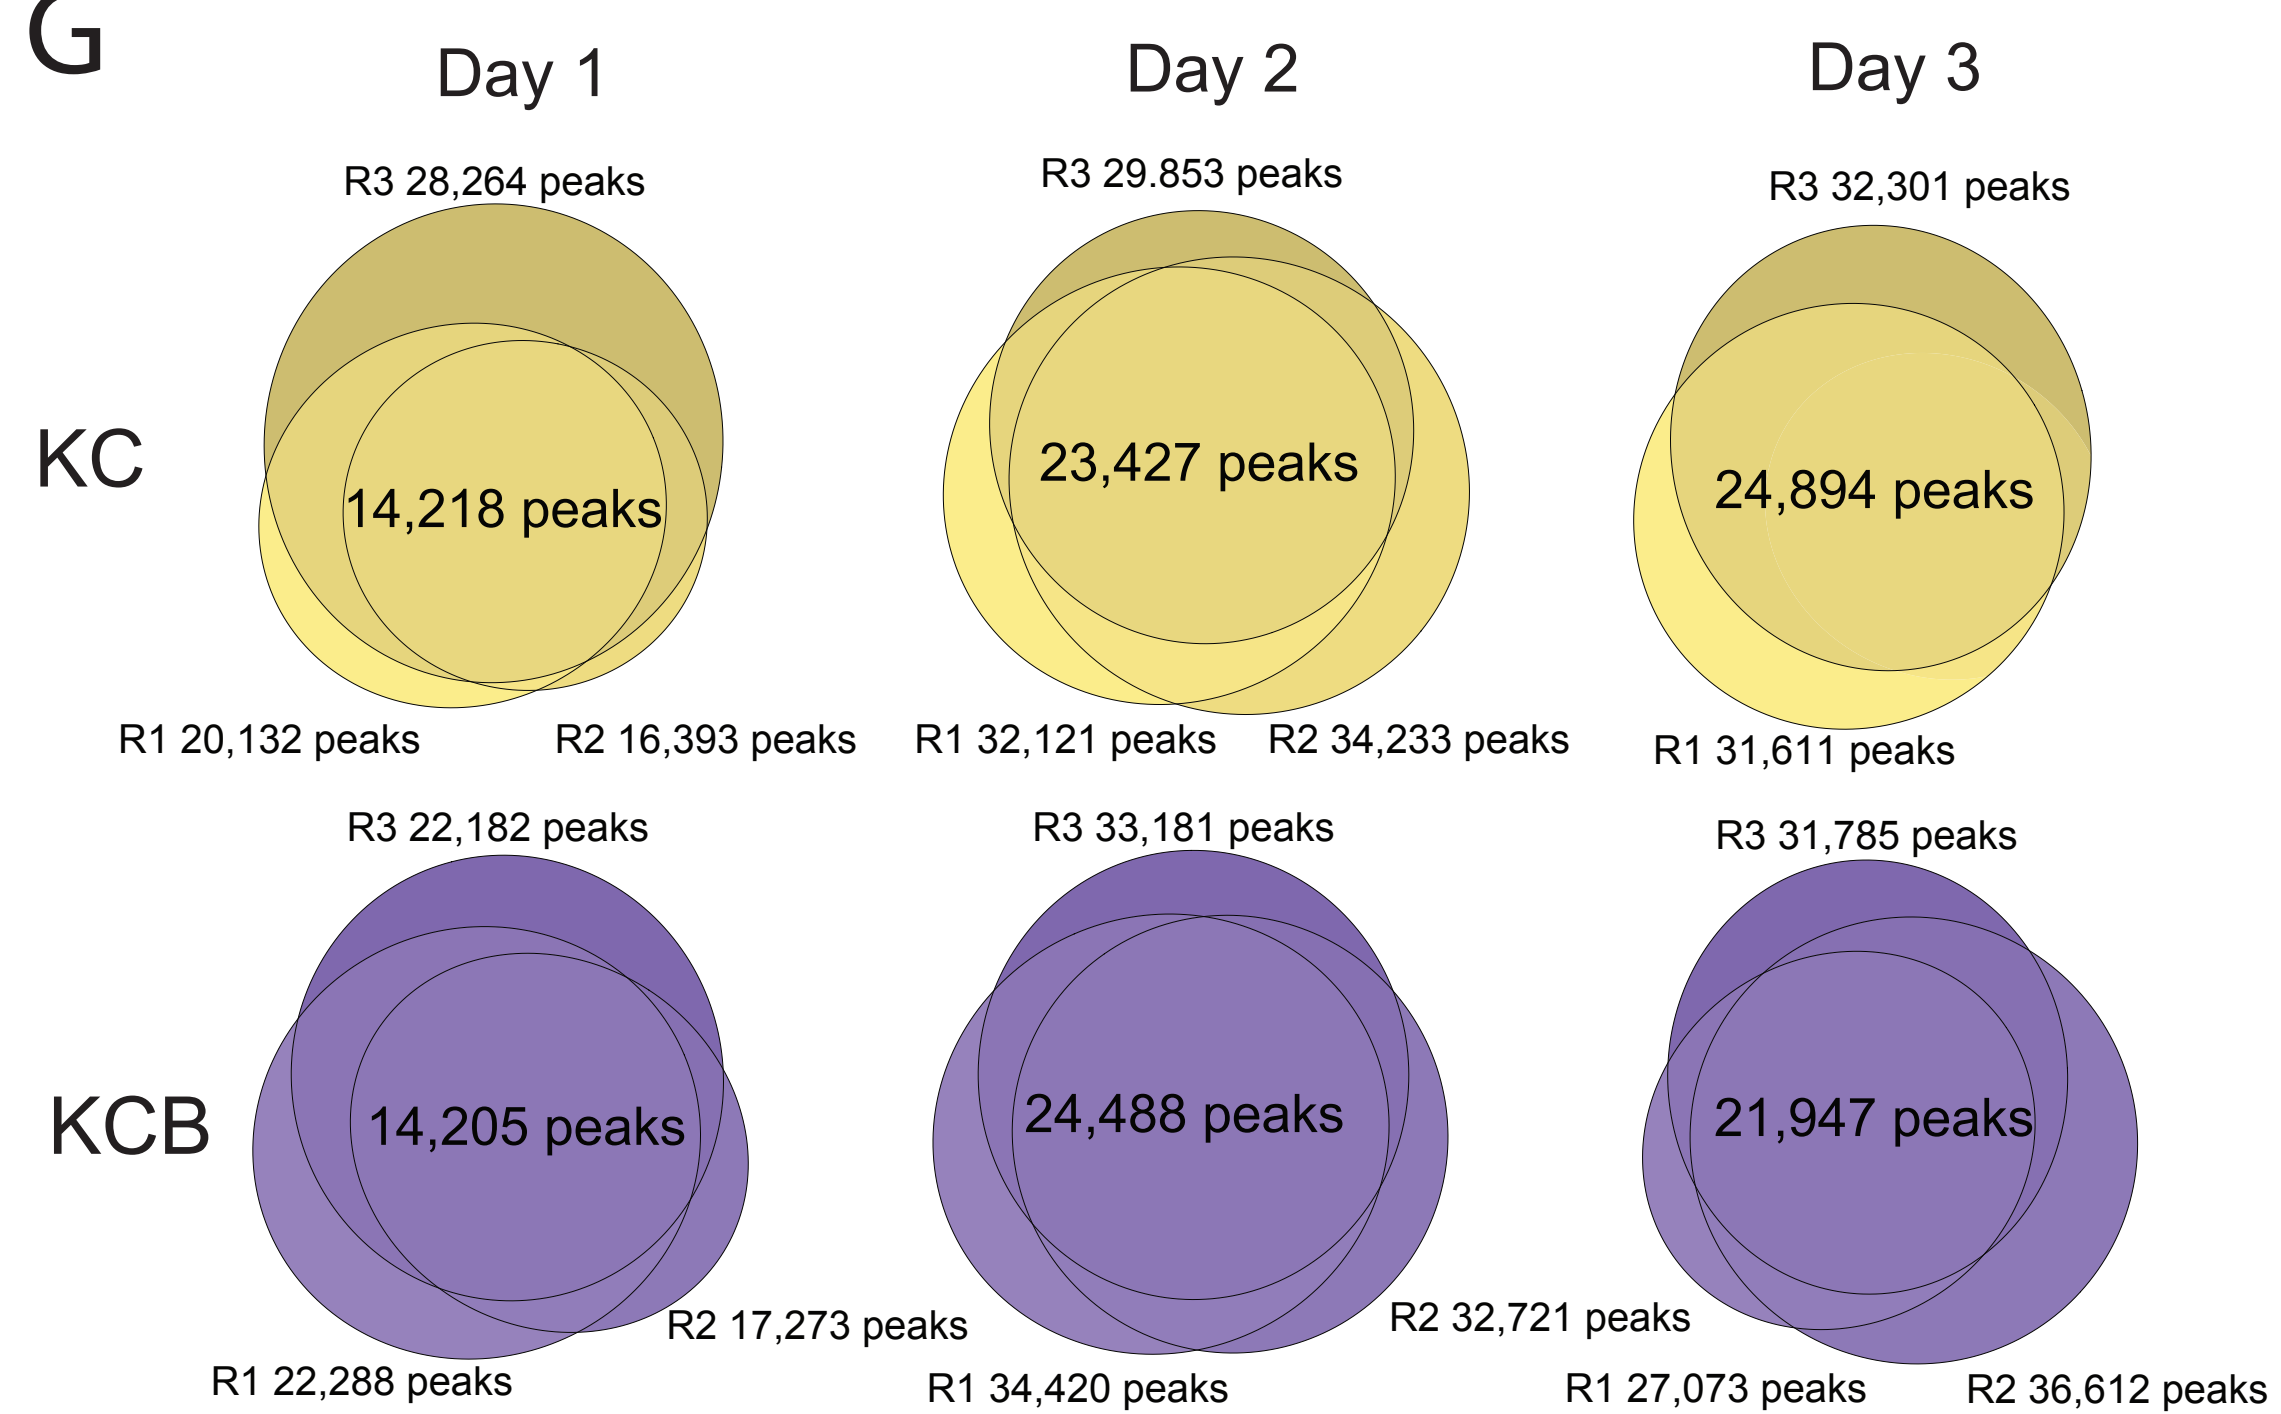

**H**

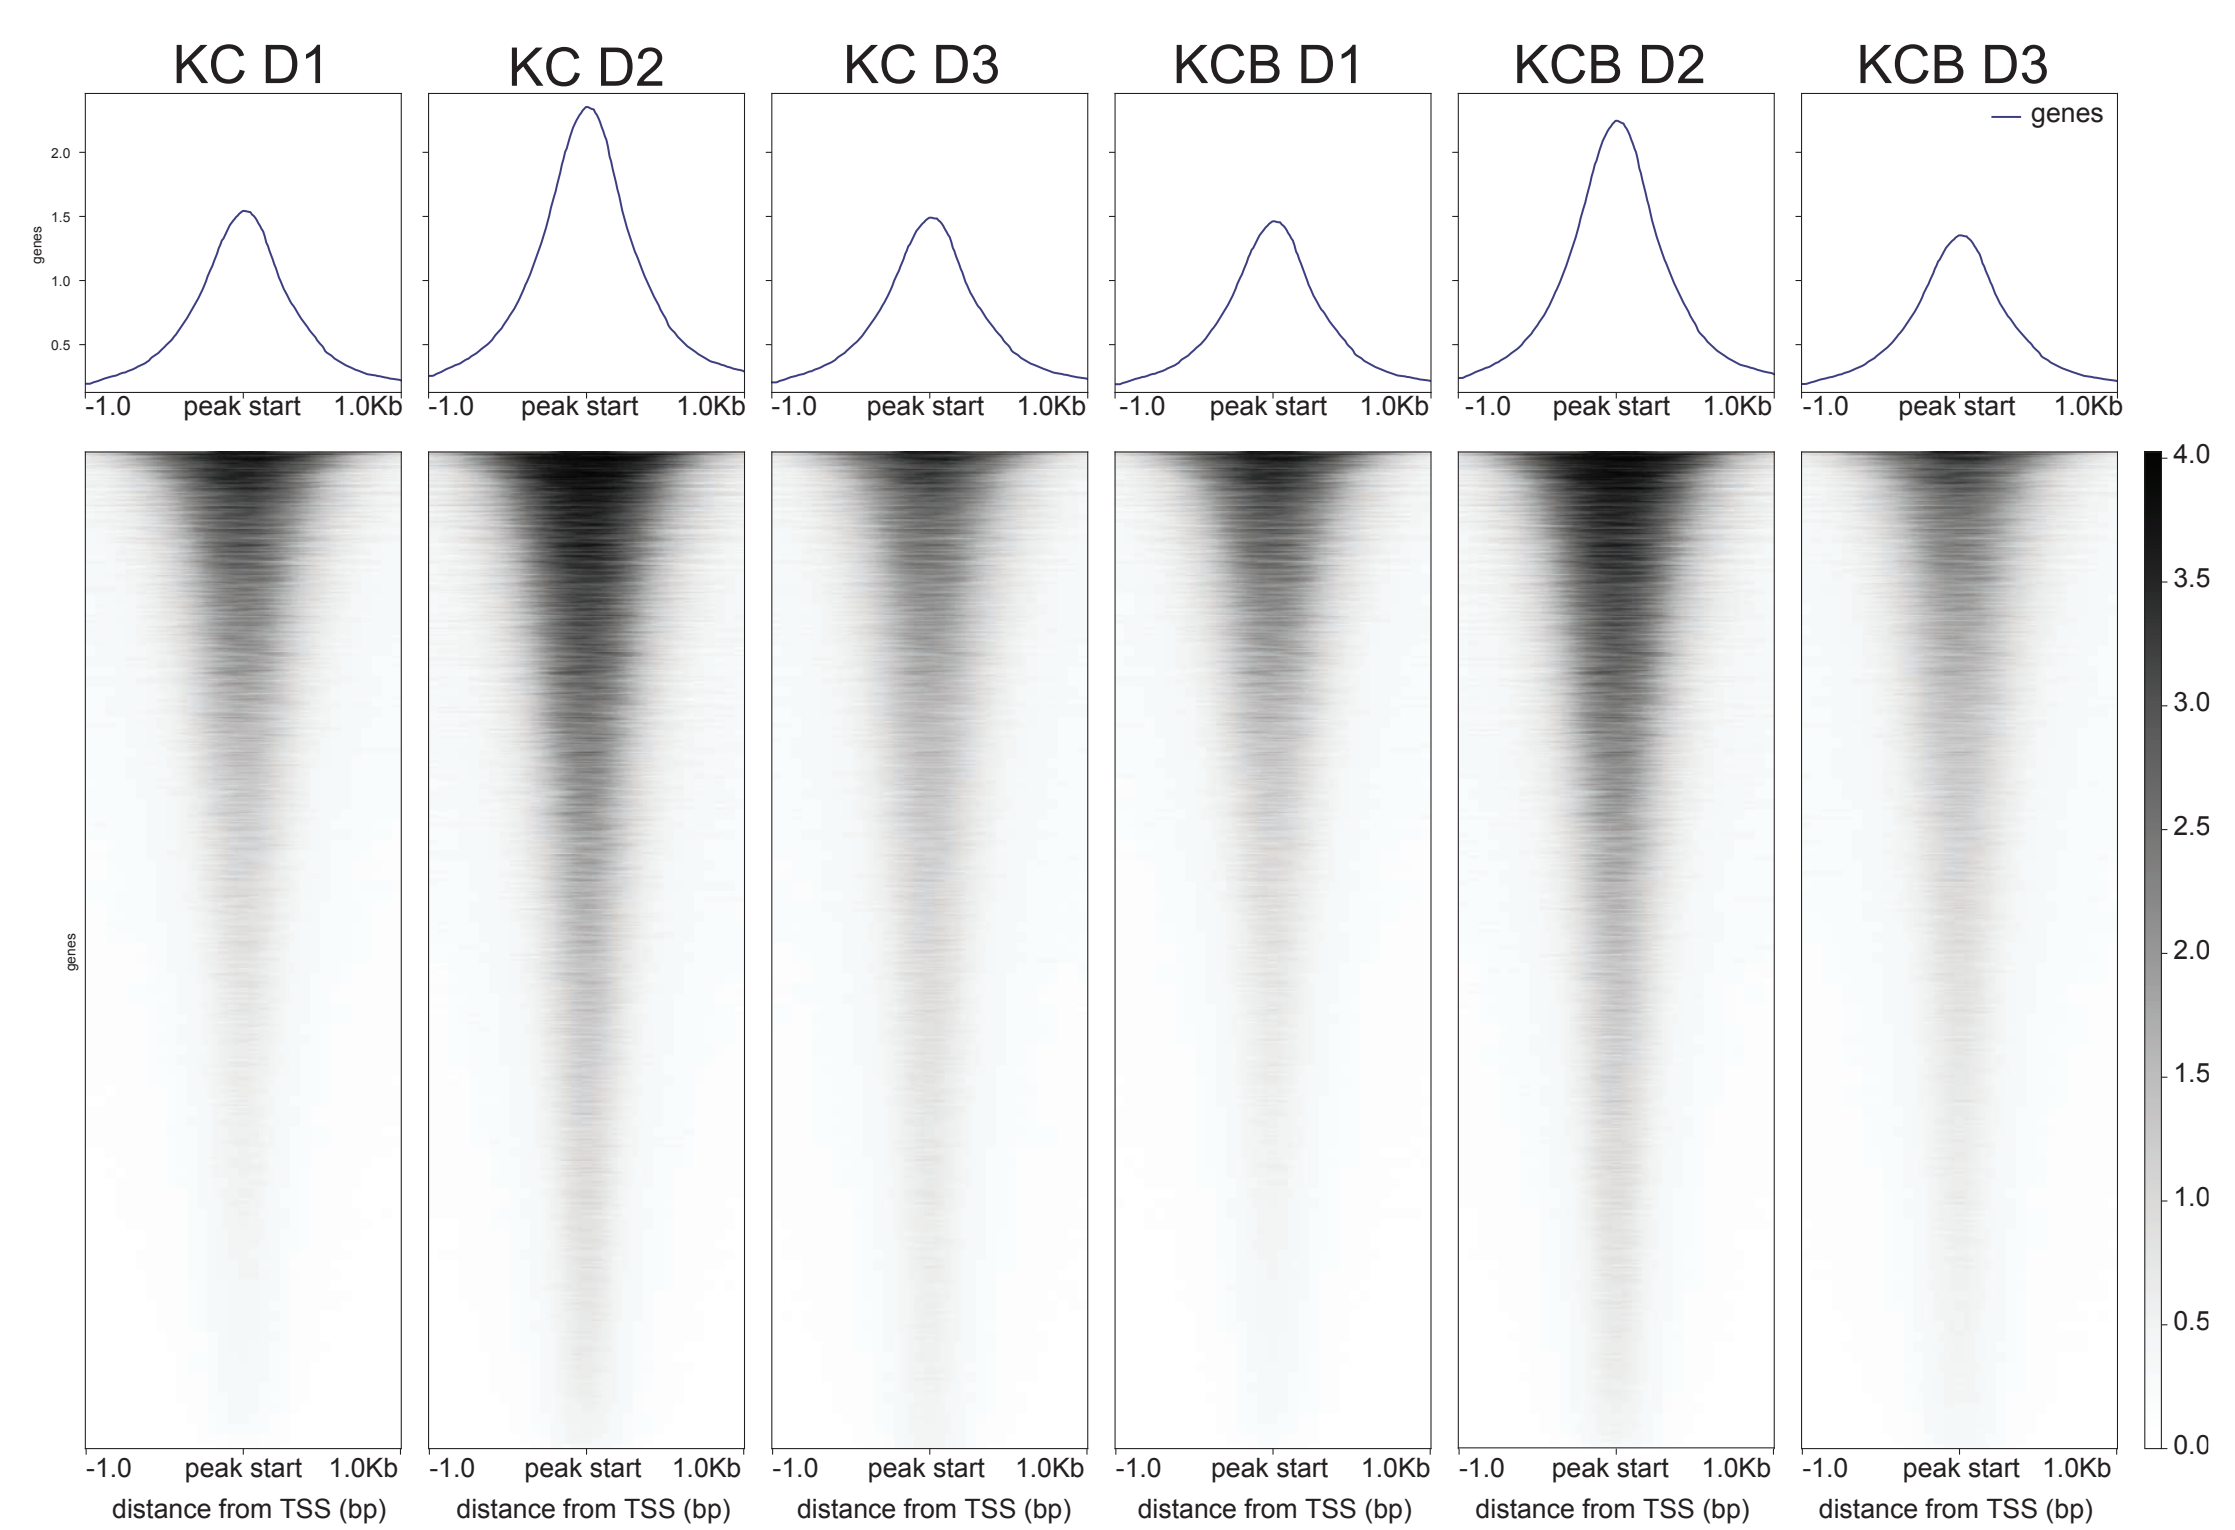



A

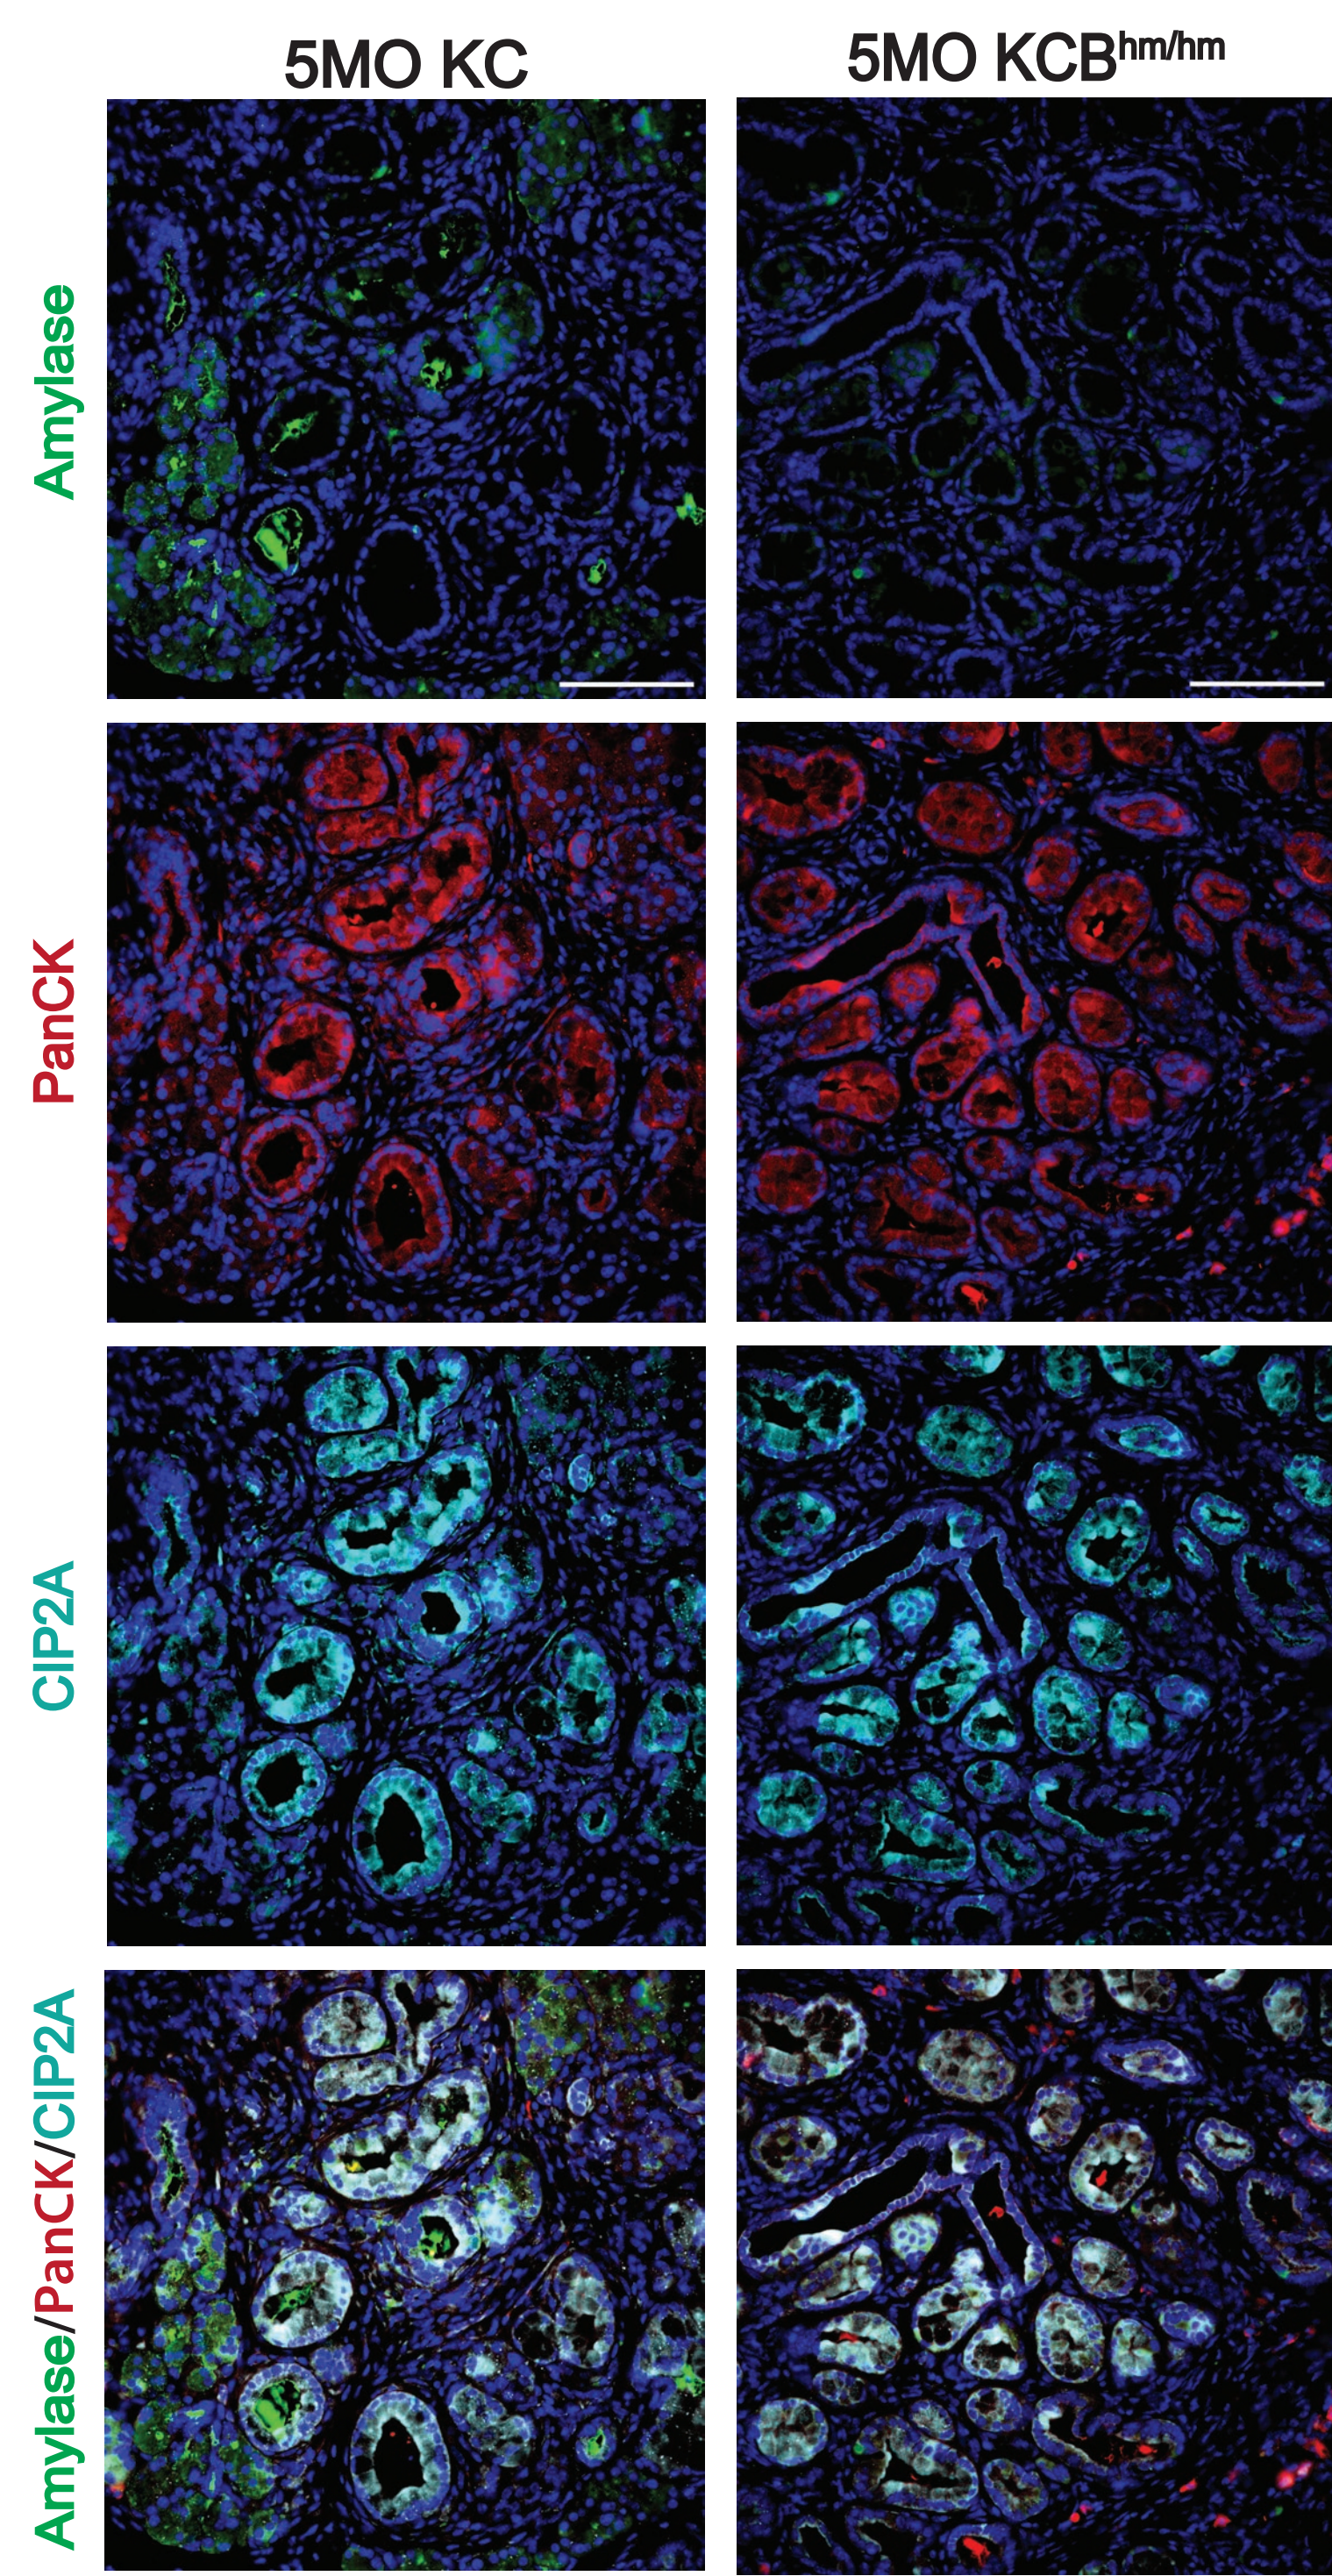

B

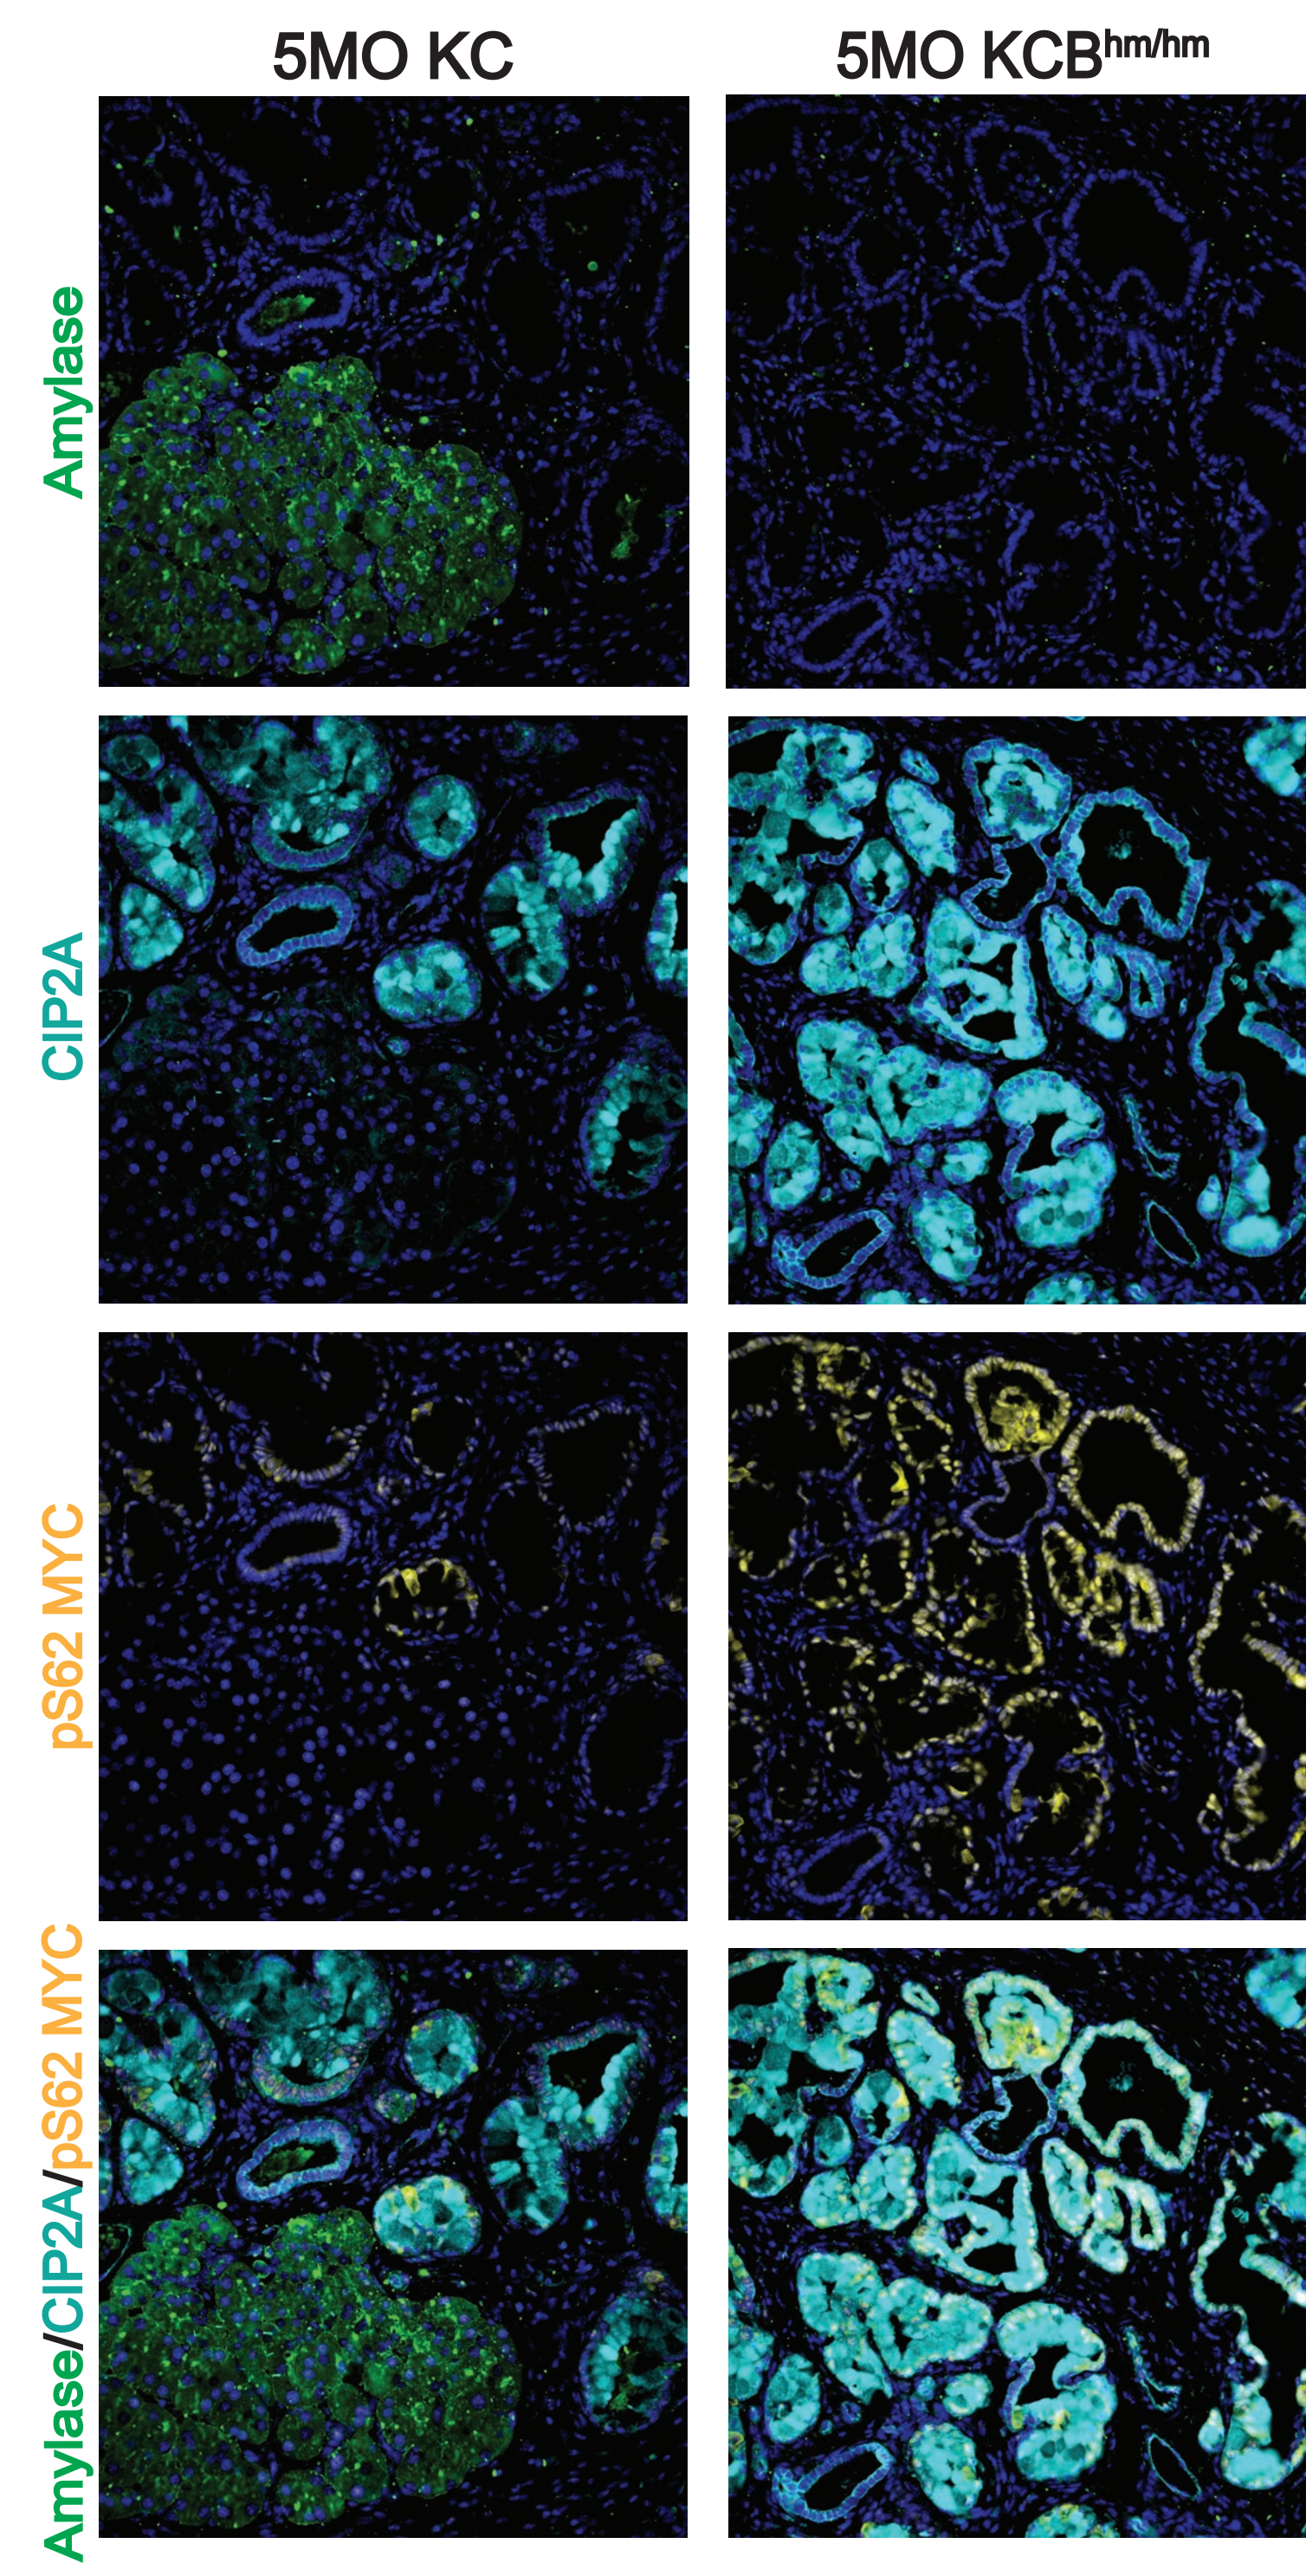

C

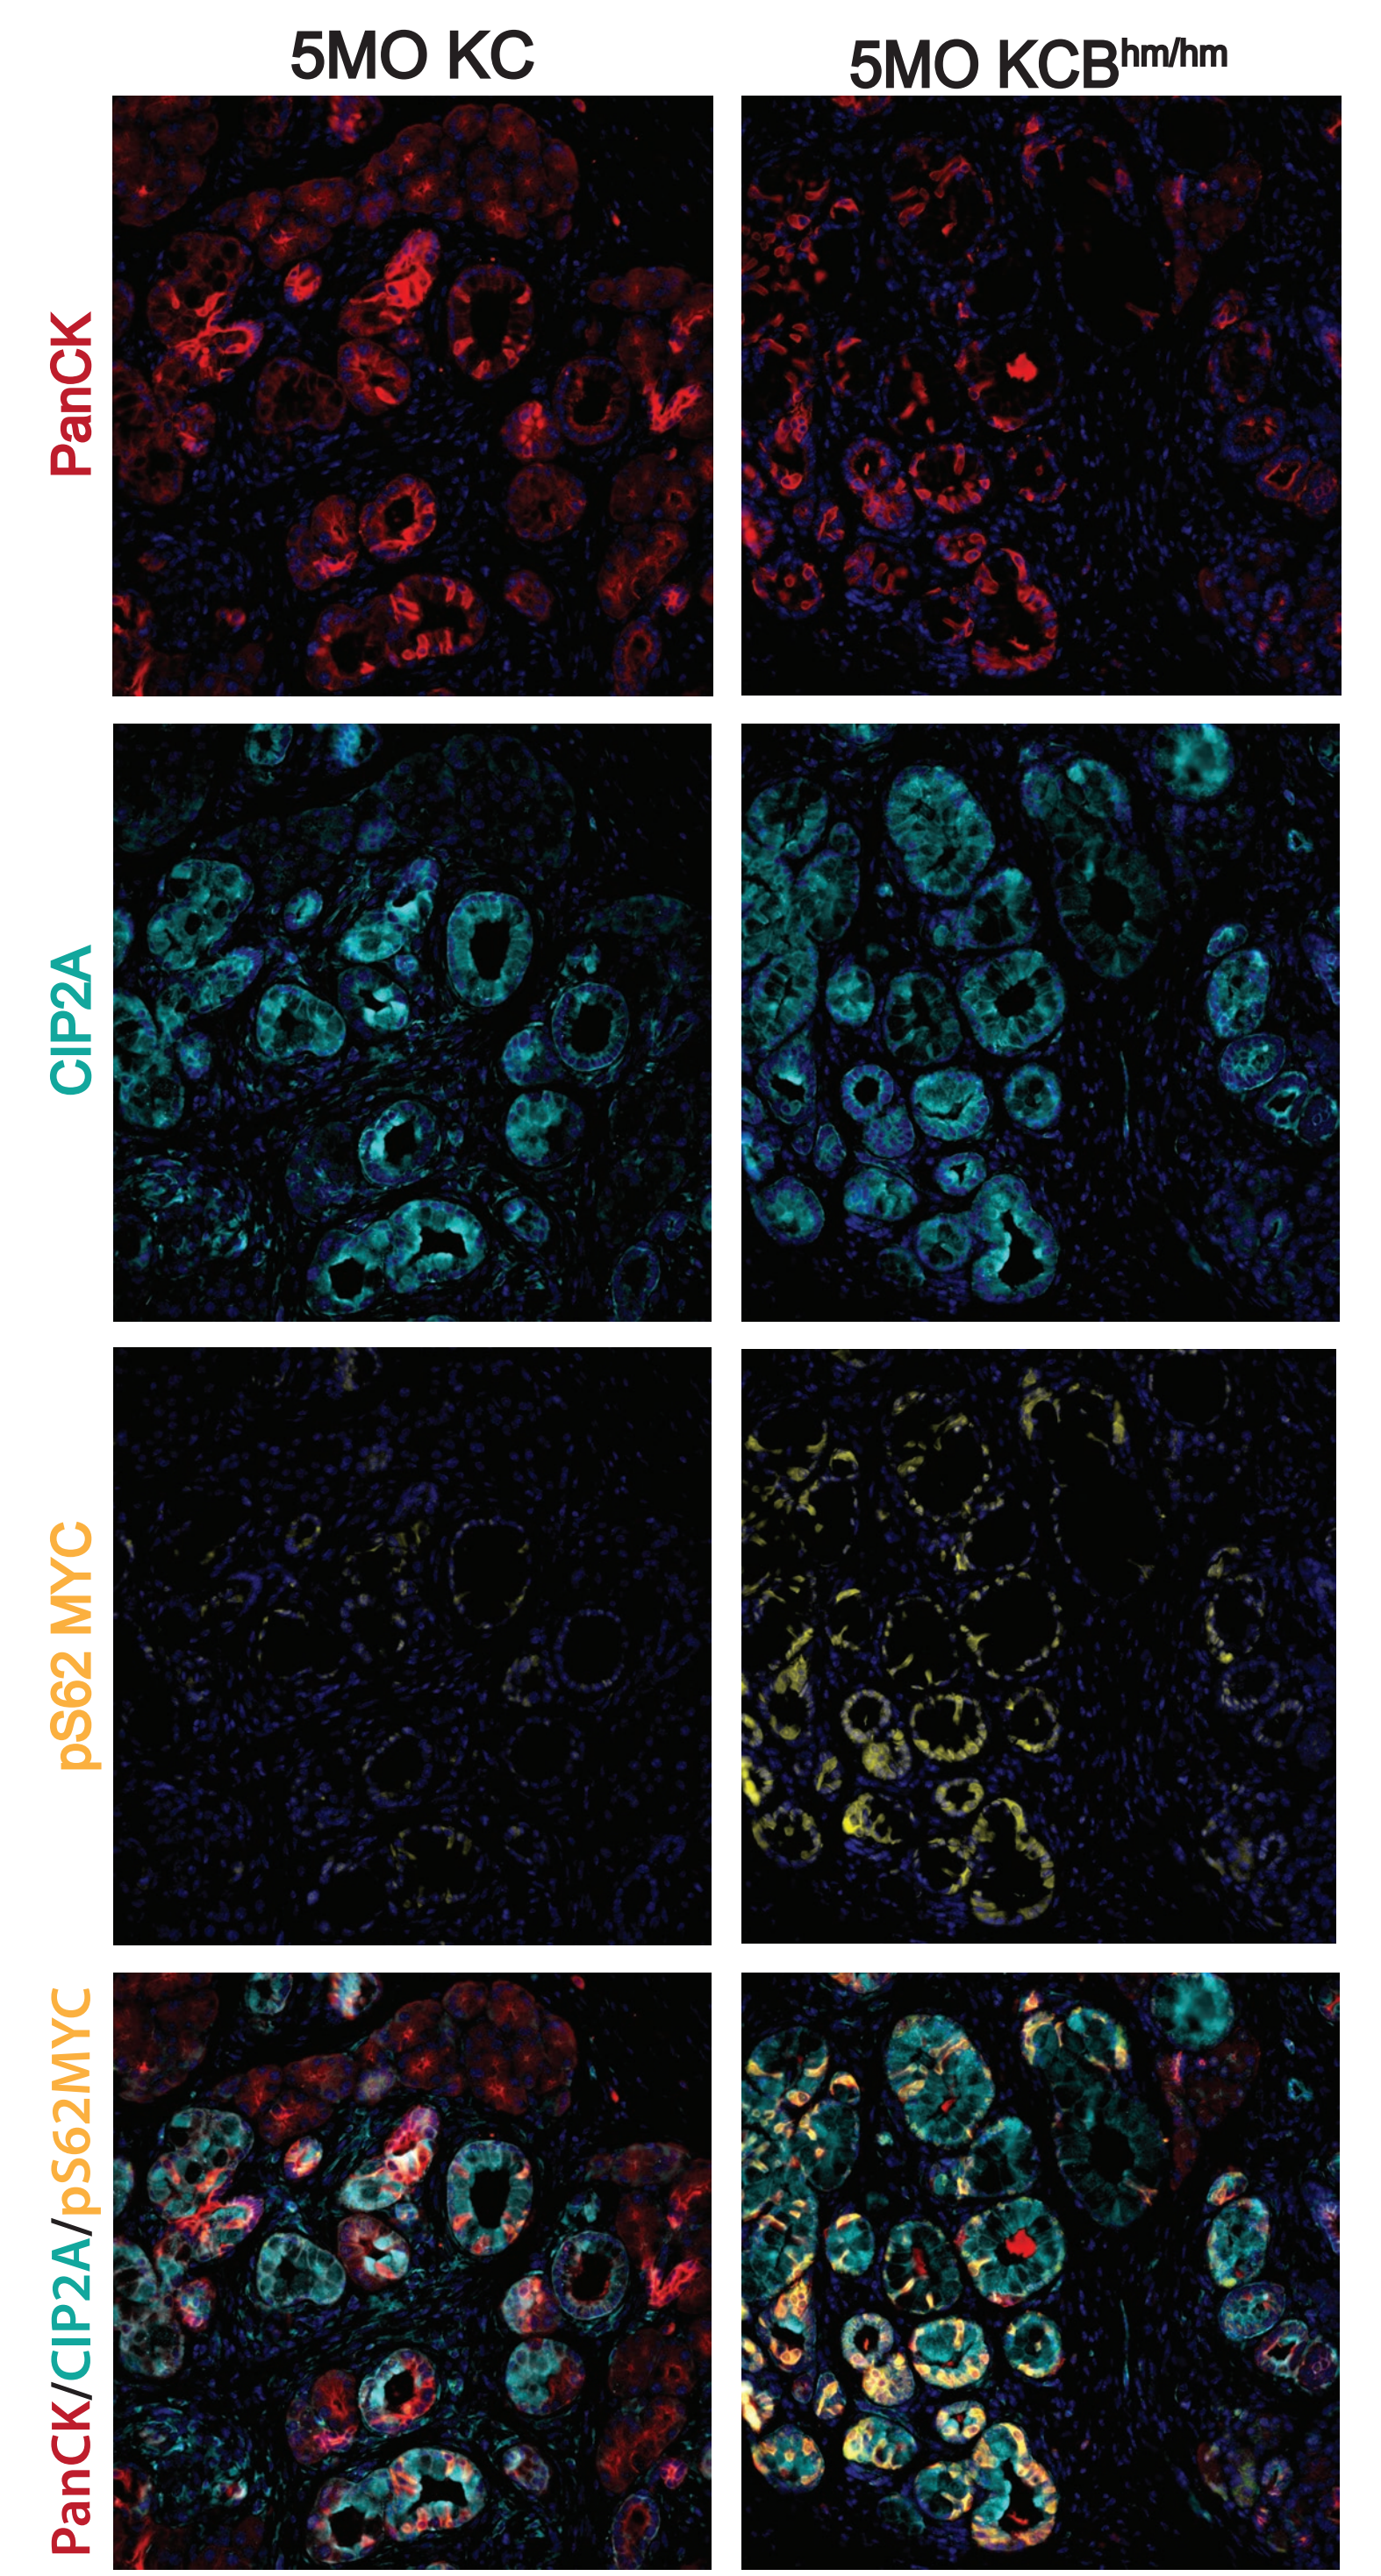

Supplement: media-1.pdf [file media-1.pdf]
